# Supplementary material
Source: publisher site journal article supplement (https://www.dovepress.com/article/395220)
Supplement: Supplementary file 1 [file get_supplementary_file.php]

Figure S1 Haemolytic value of 214 *Staphylococcus aureus* isolates

Figure S1  
A

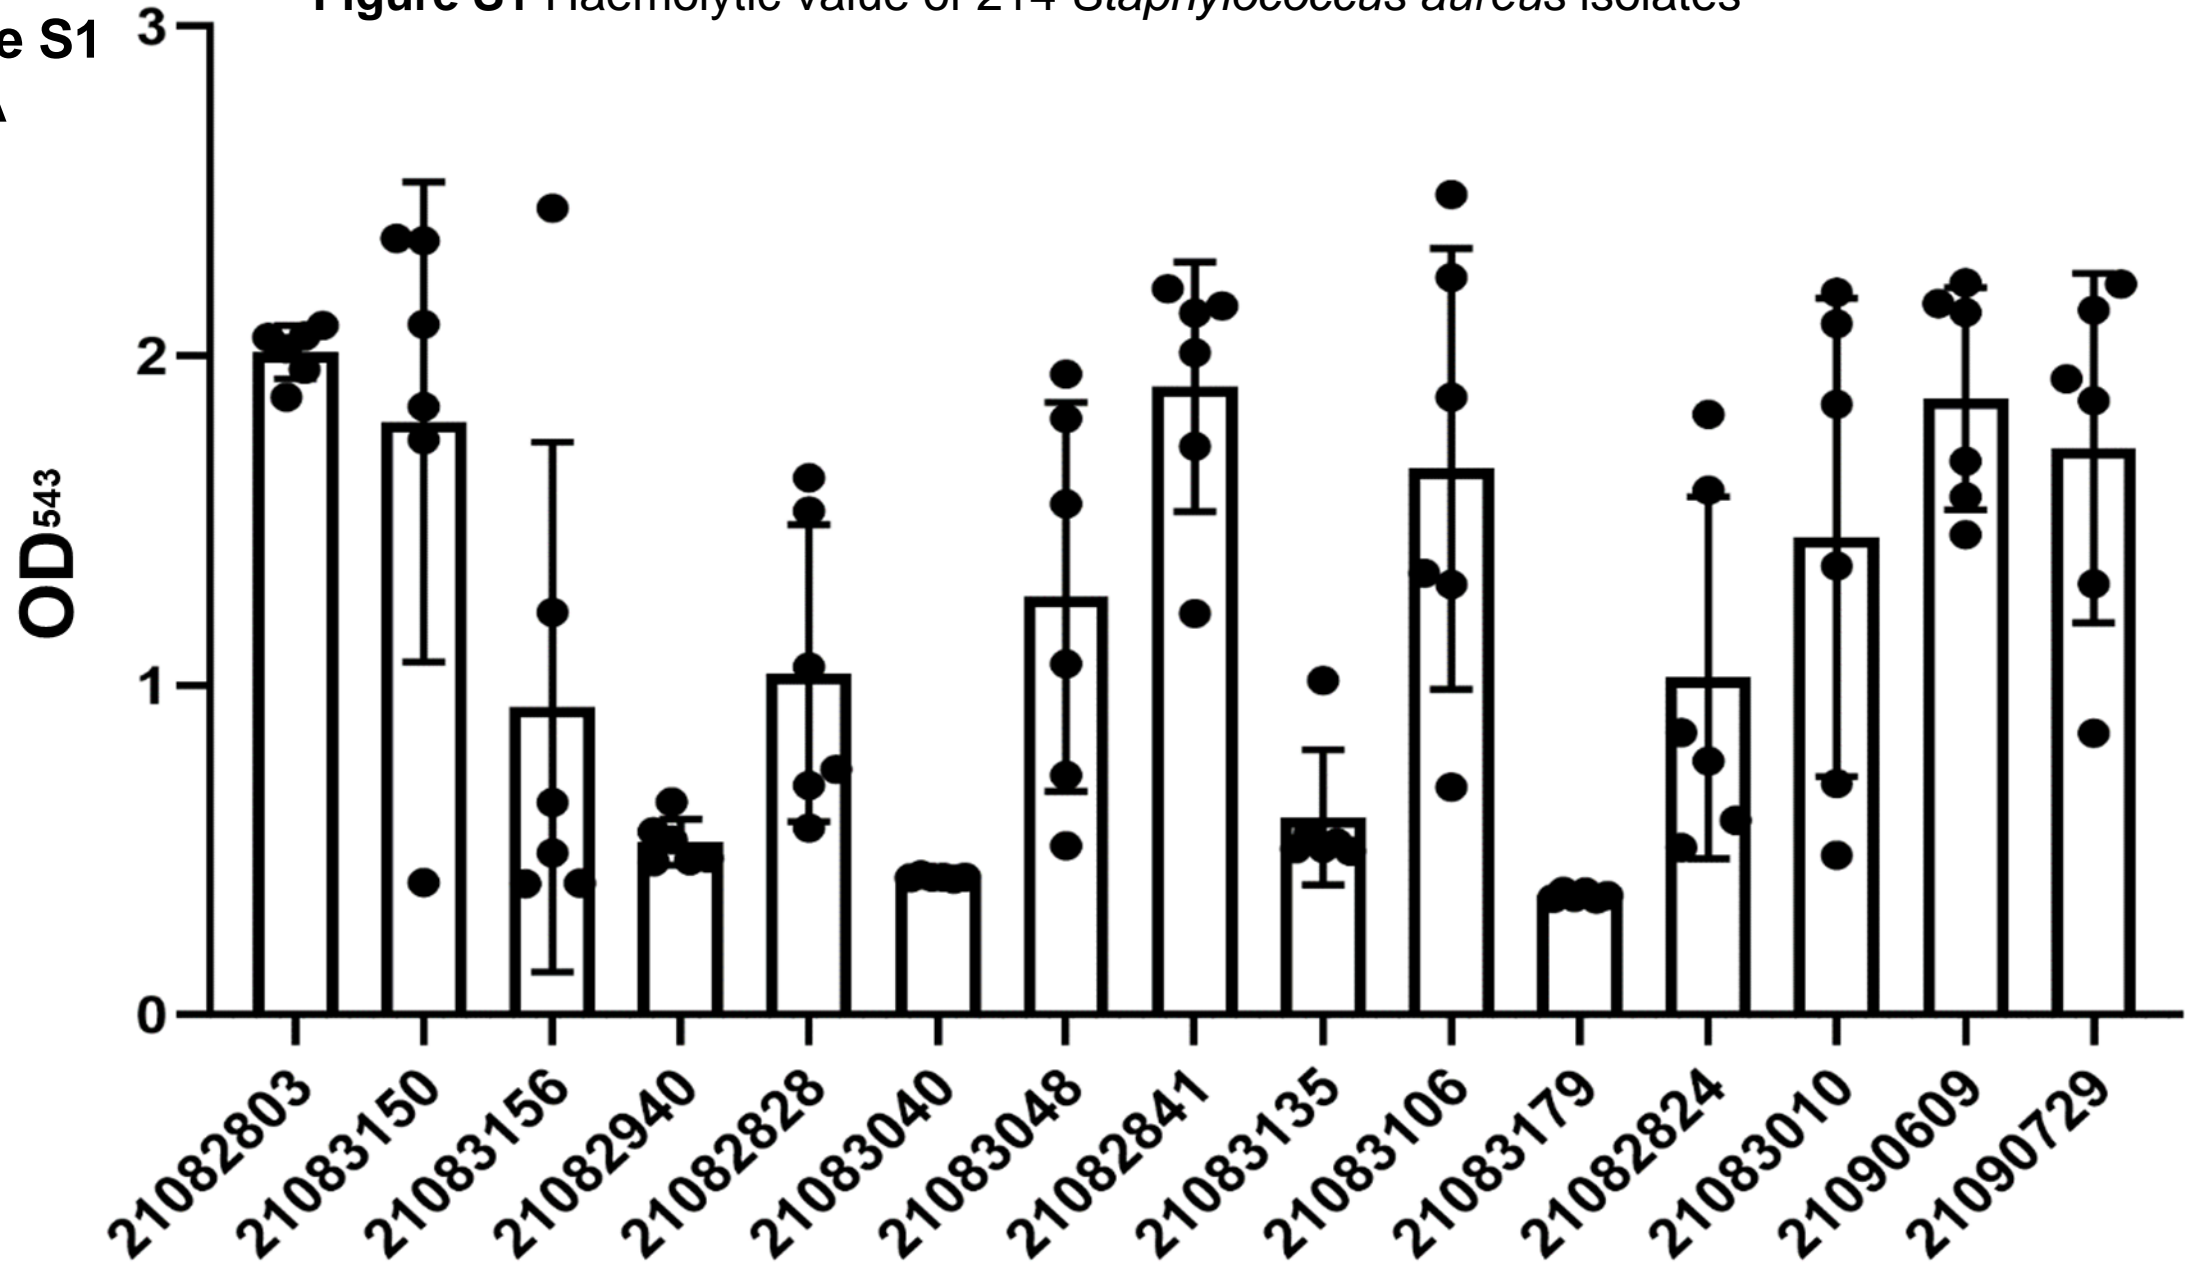

Figure S1

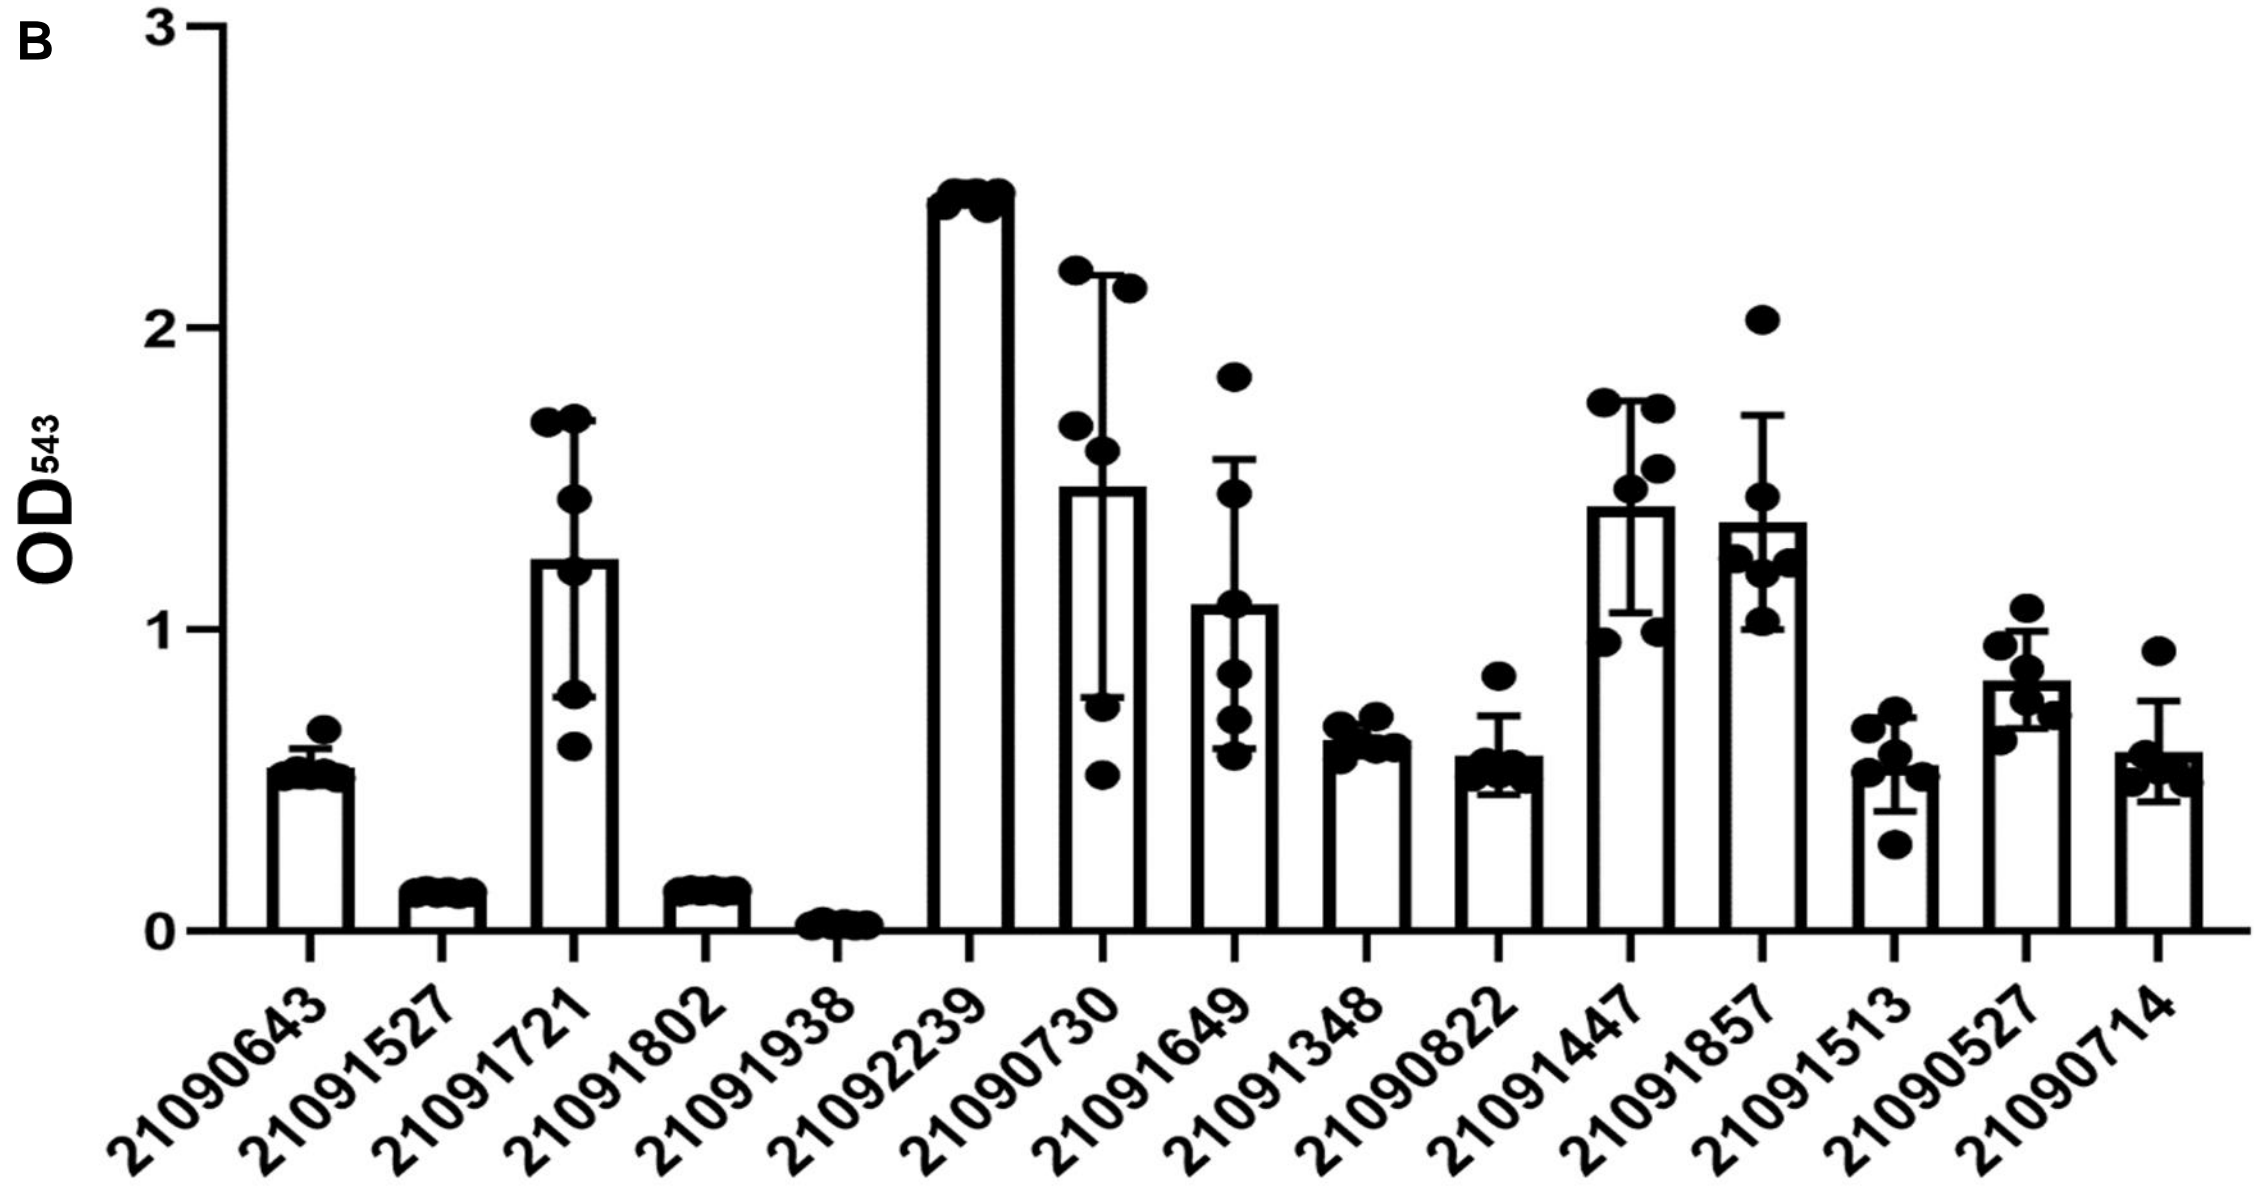

Figure S1

C

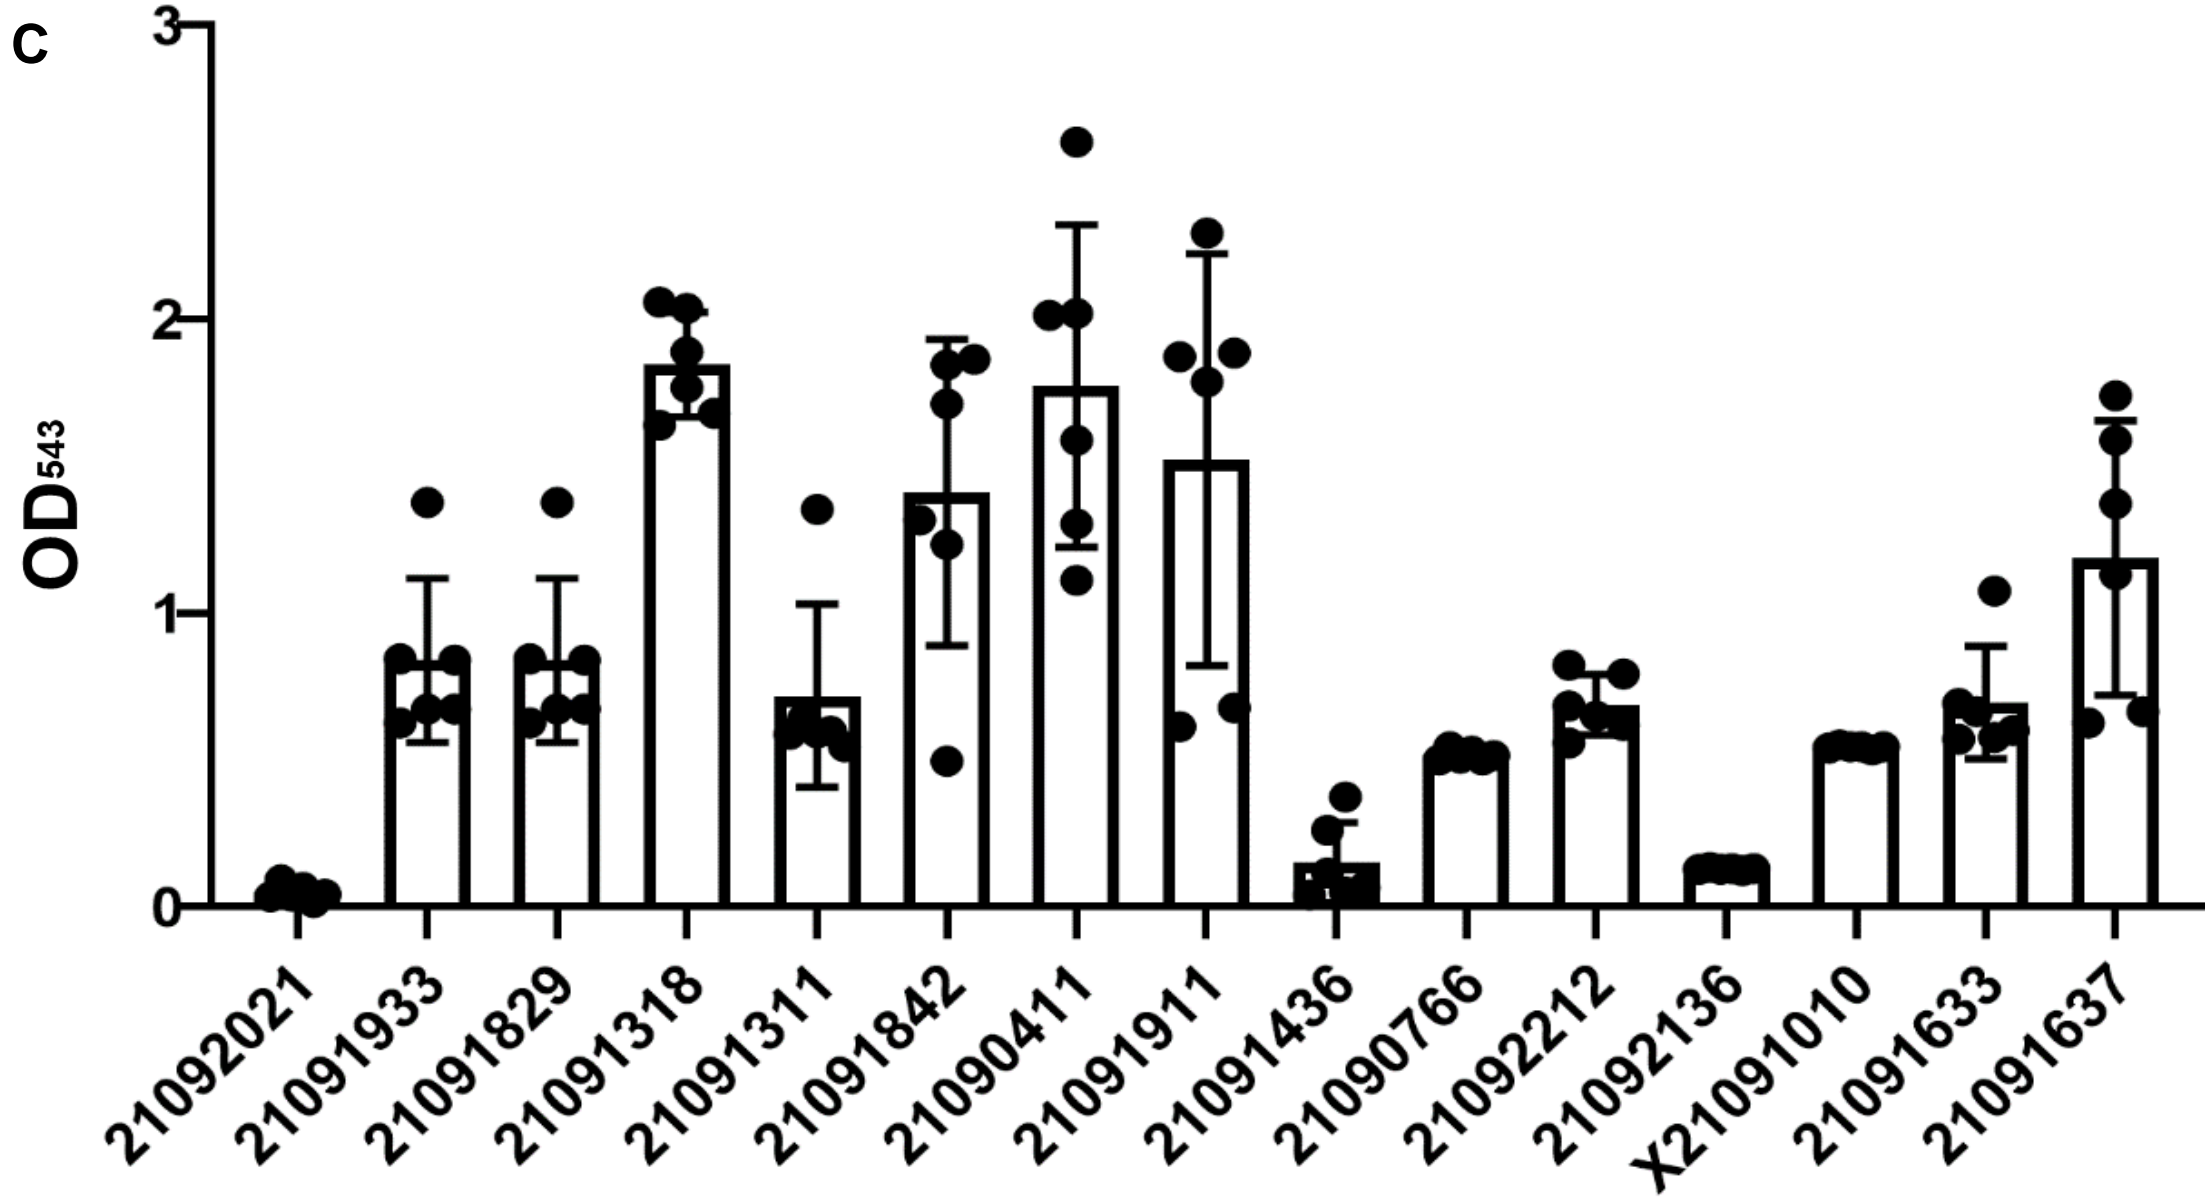

Figure S1  
D

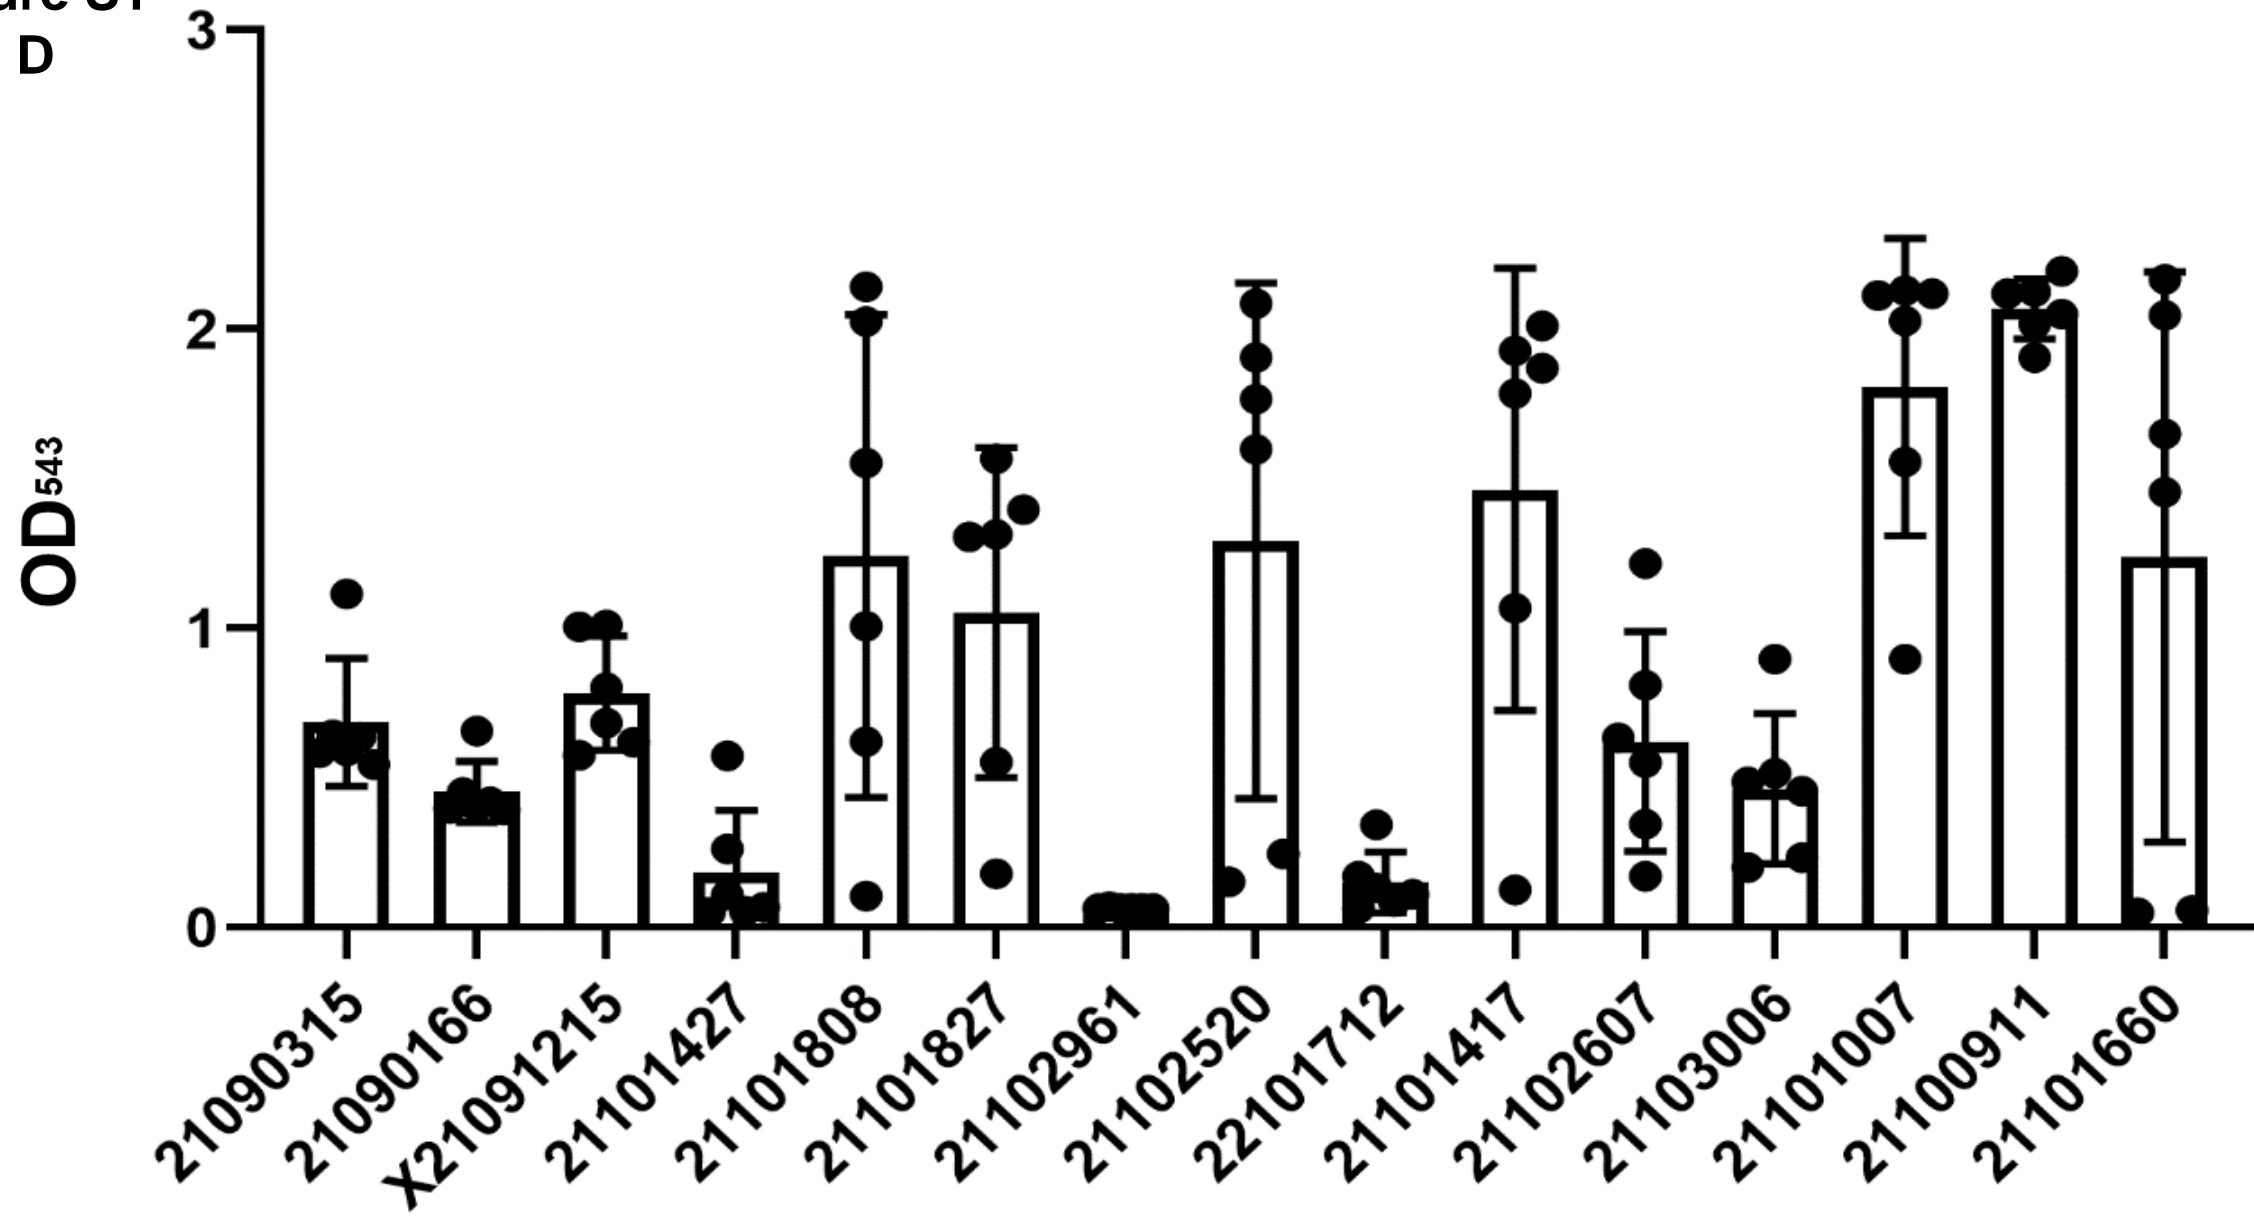

Figure S1

E

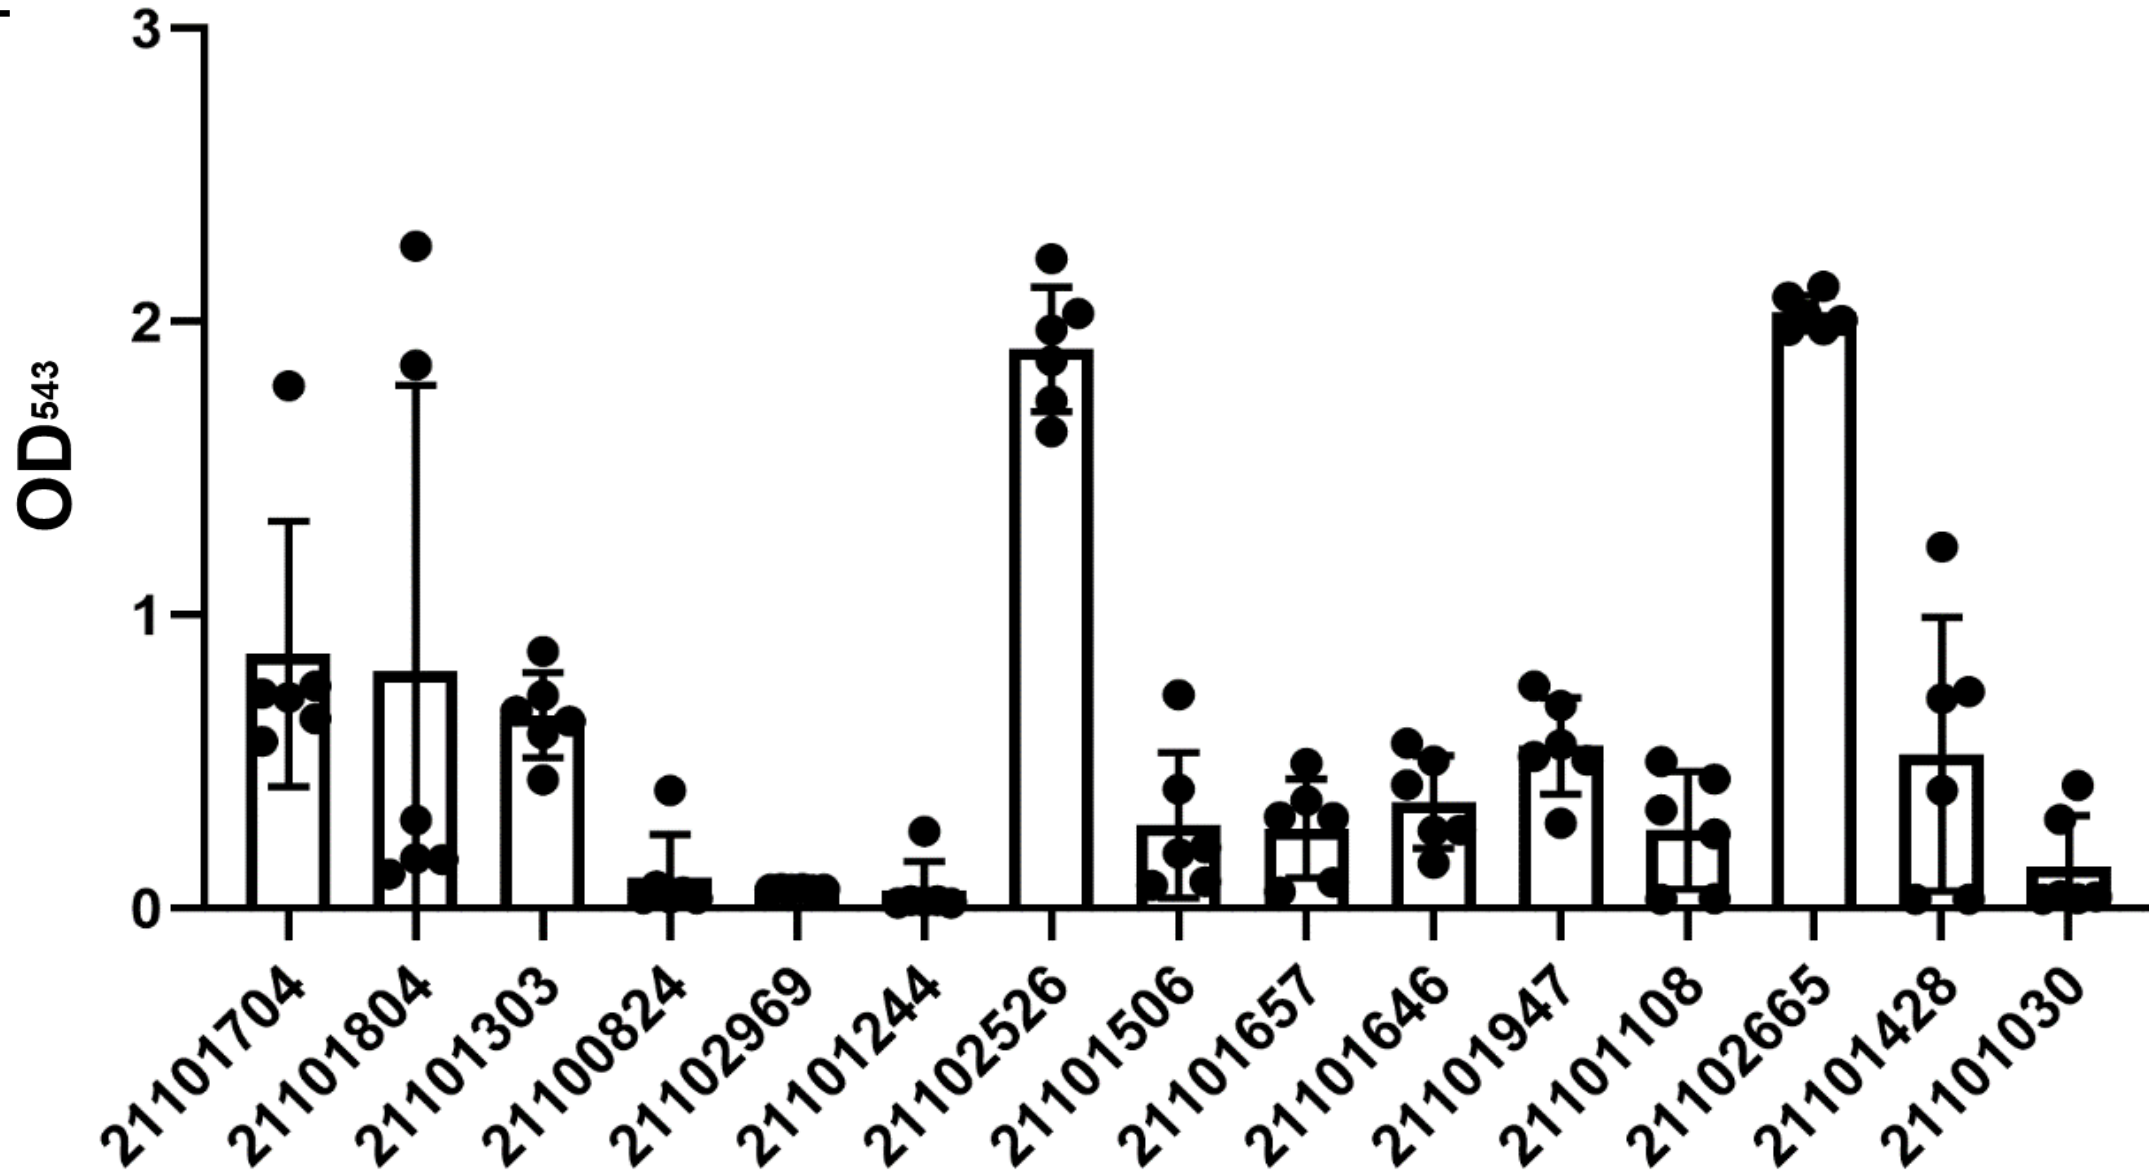

Figure S1  
F

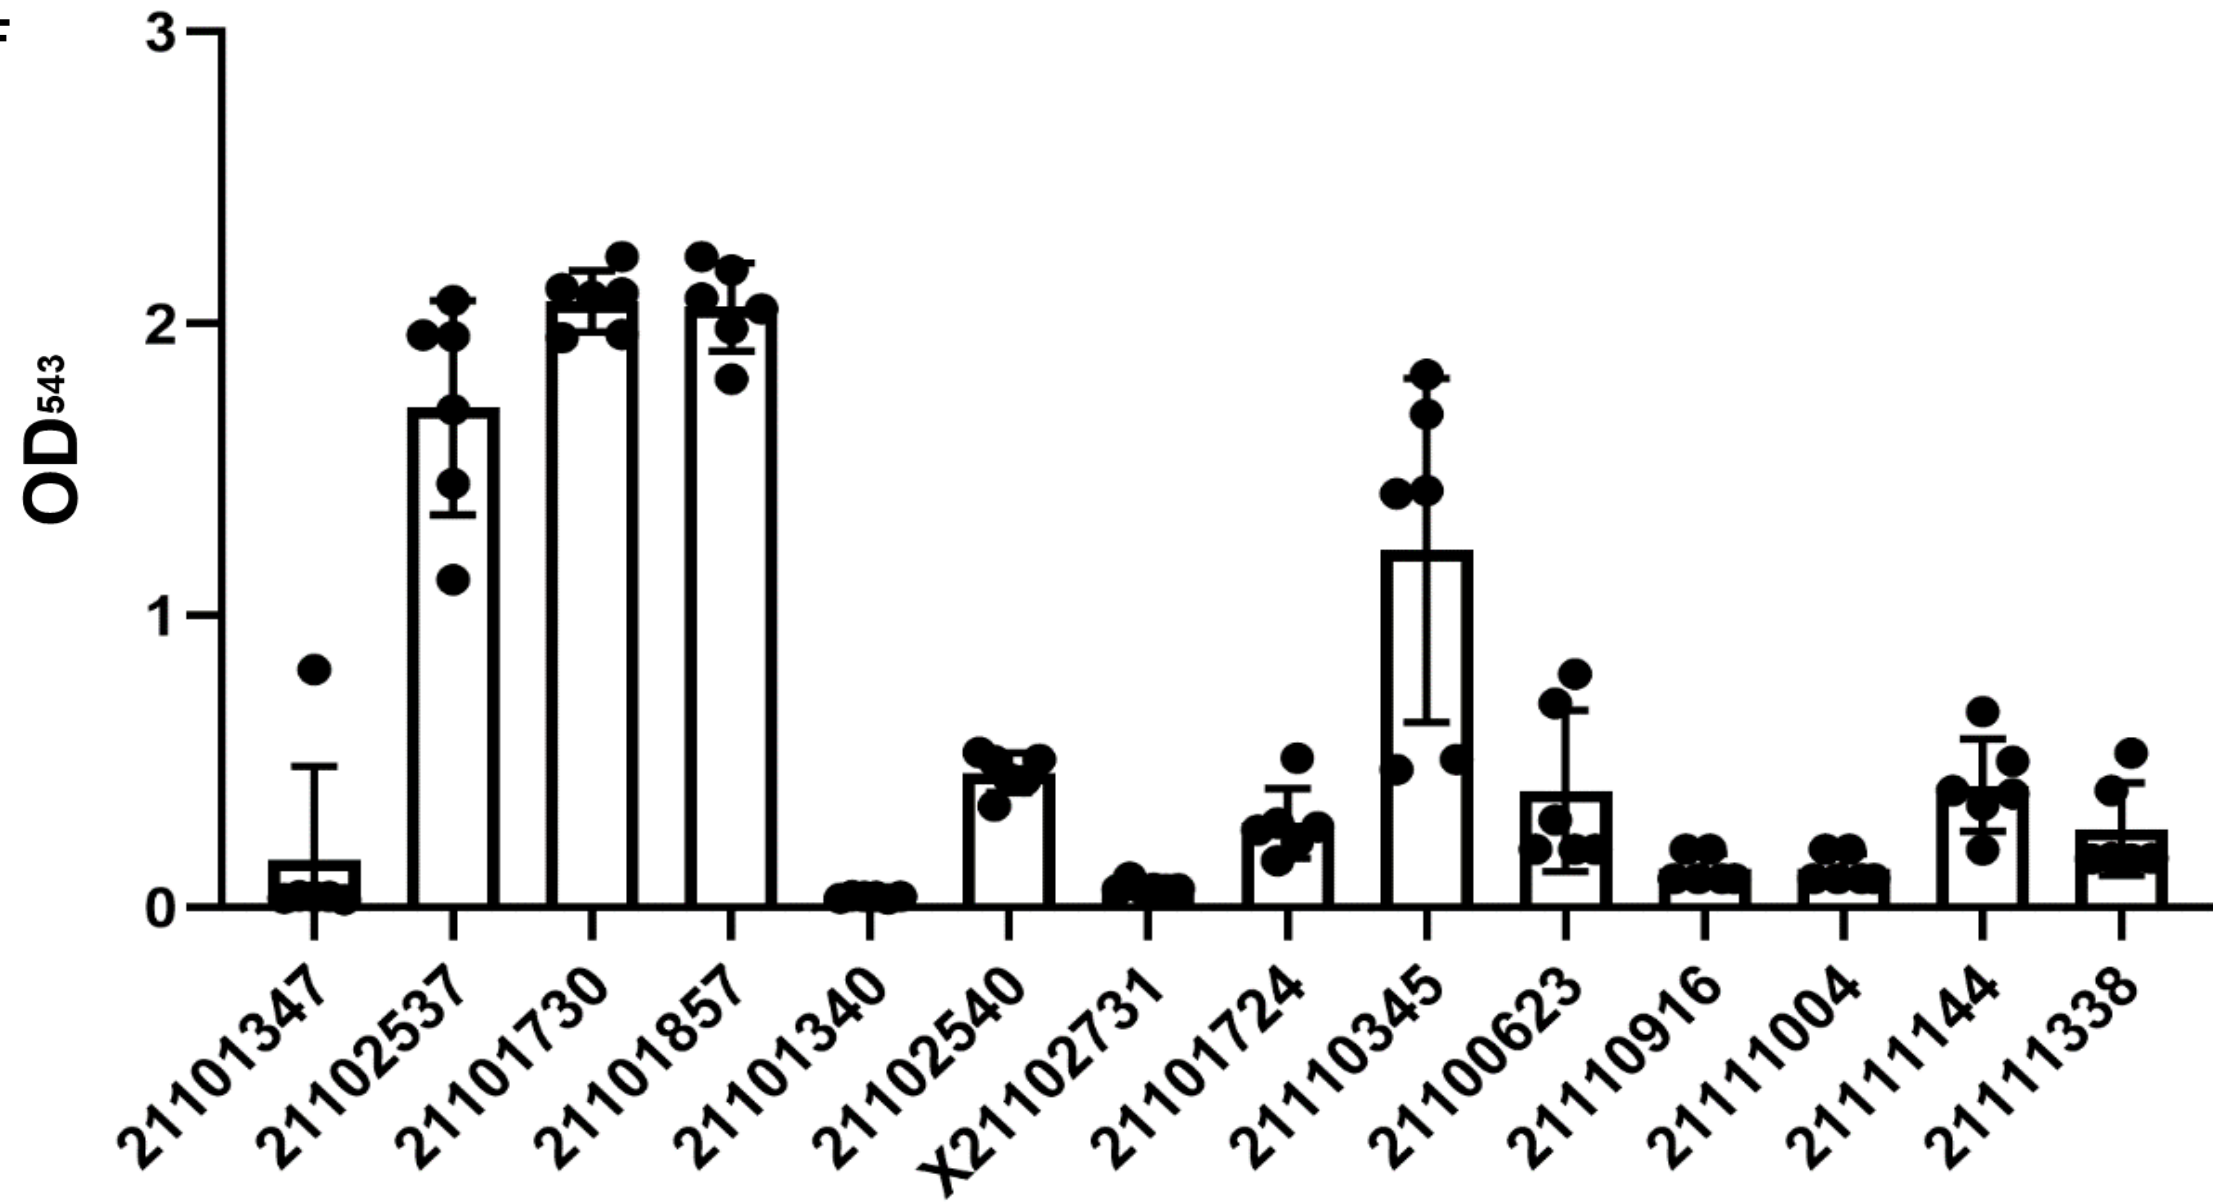

Figure S1  
G

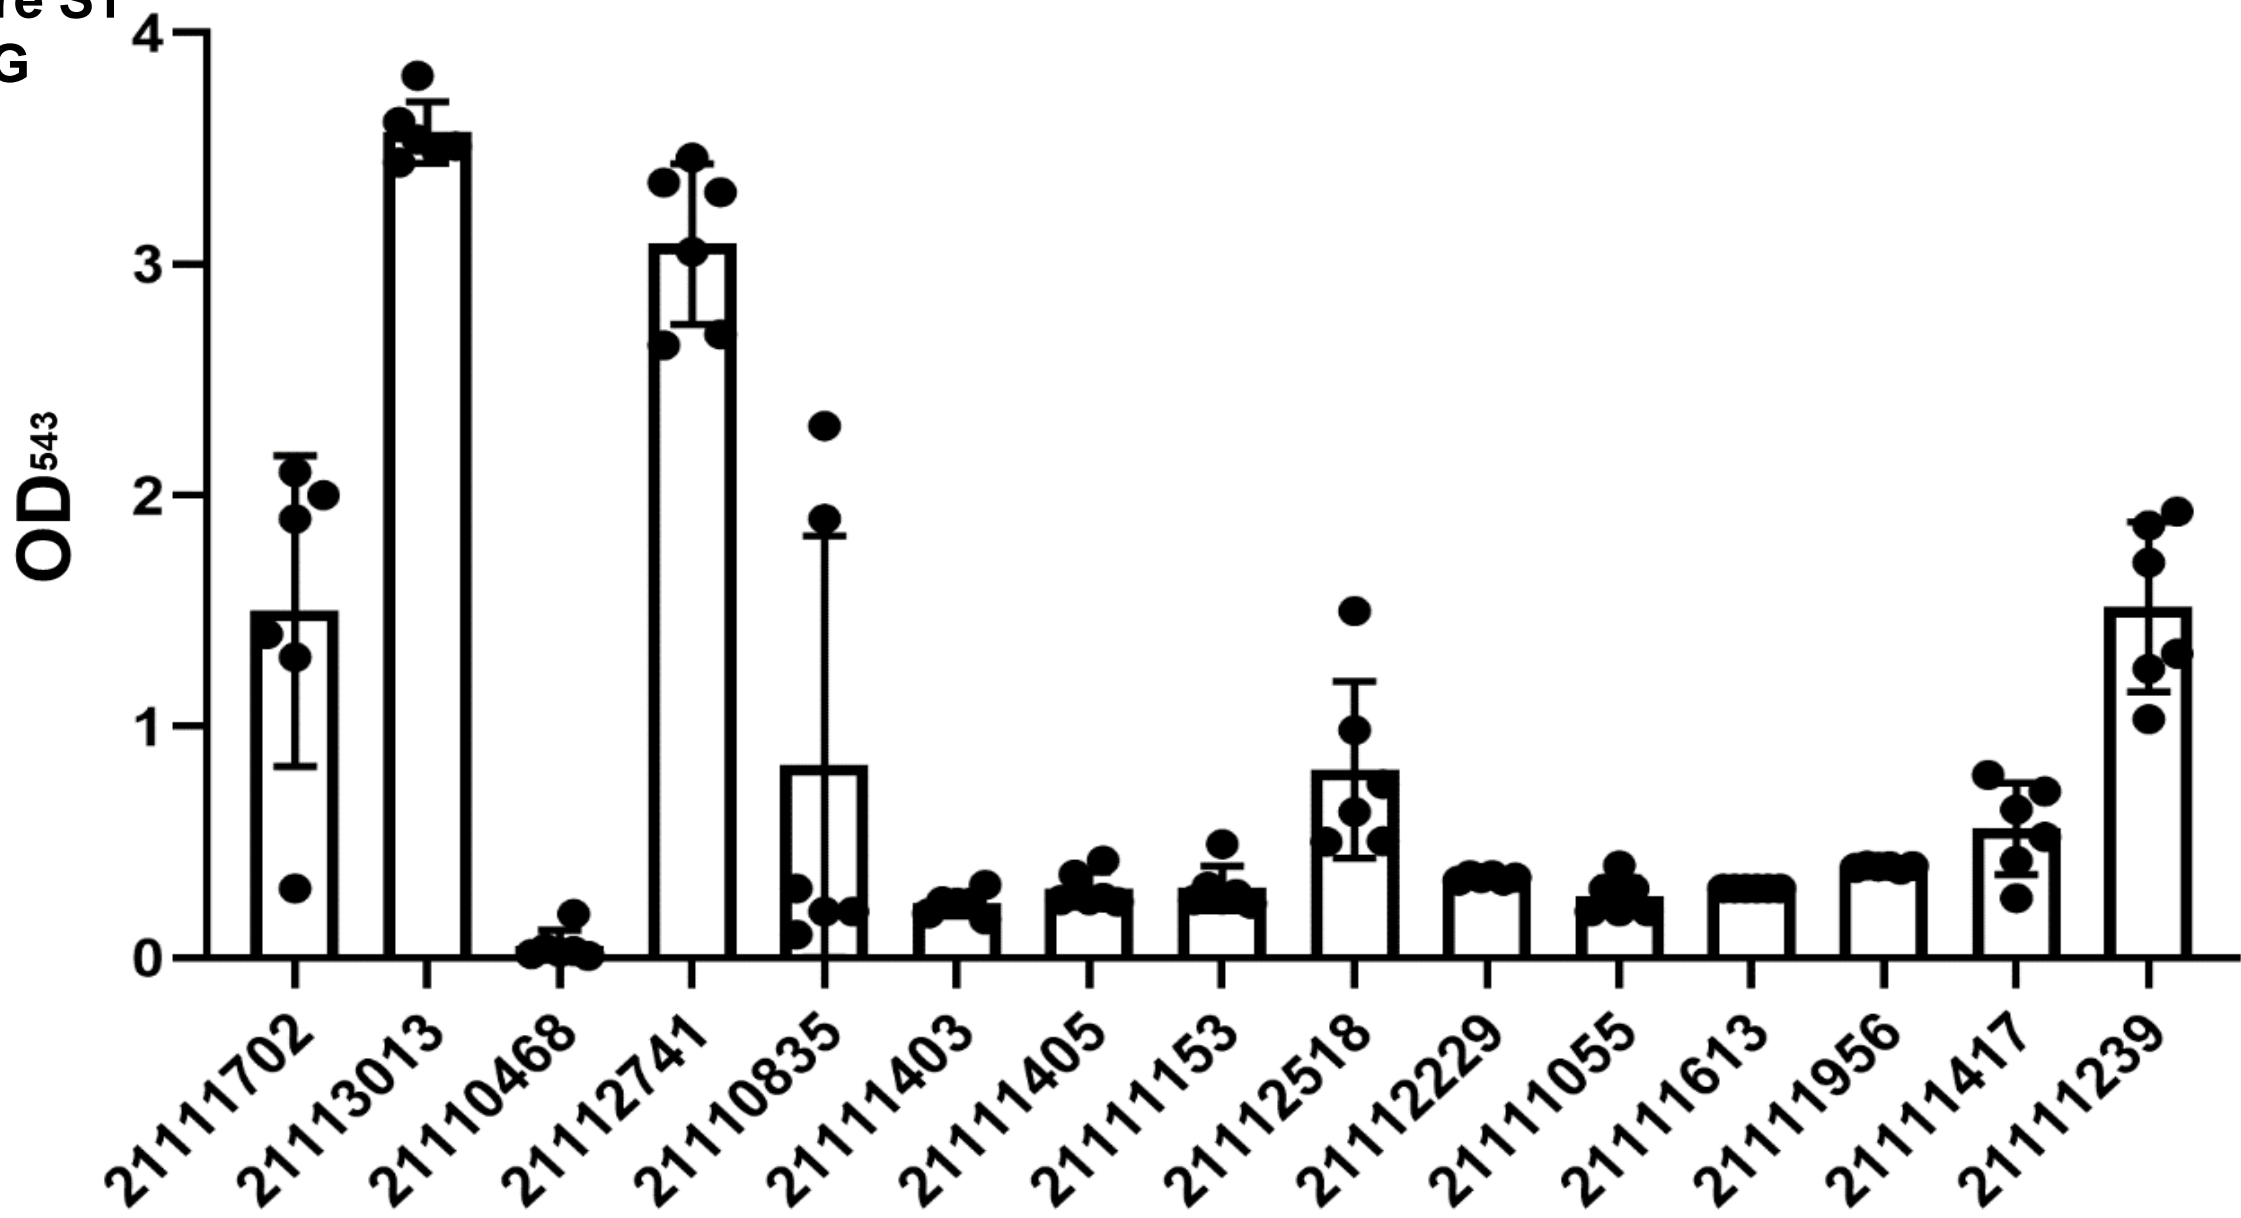

Figure S1  
H

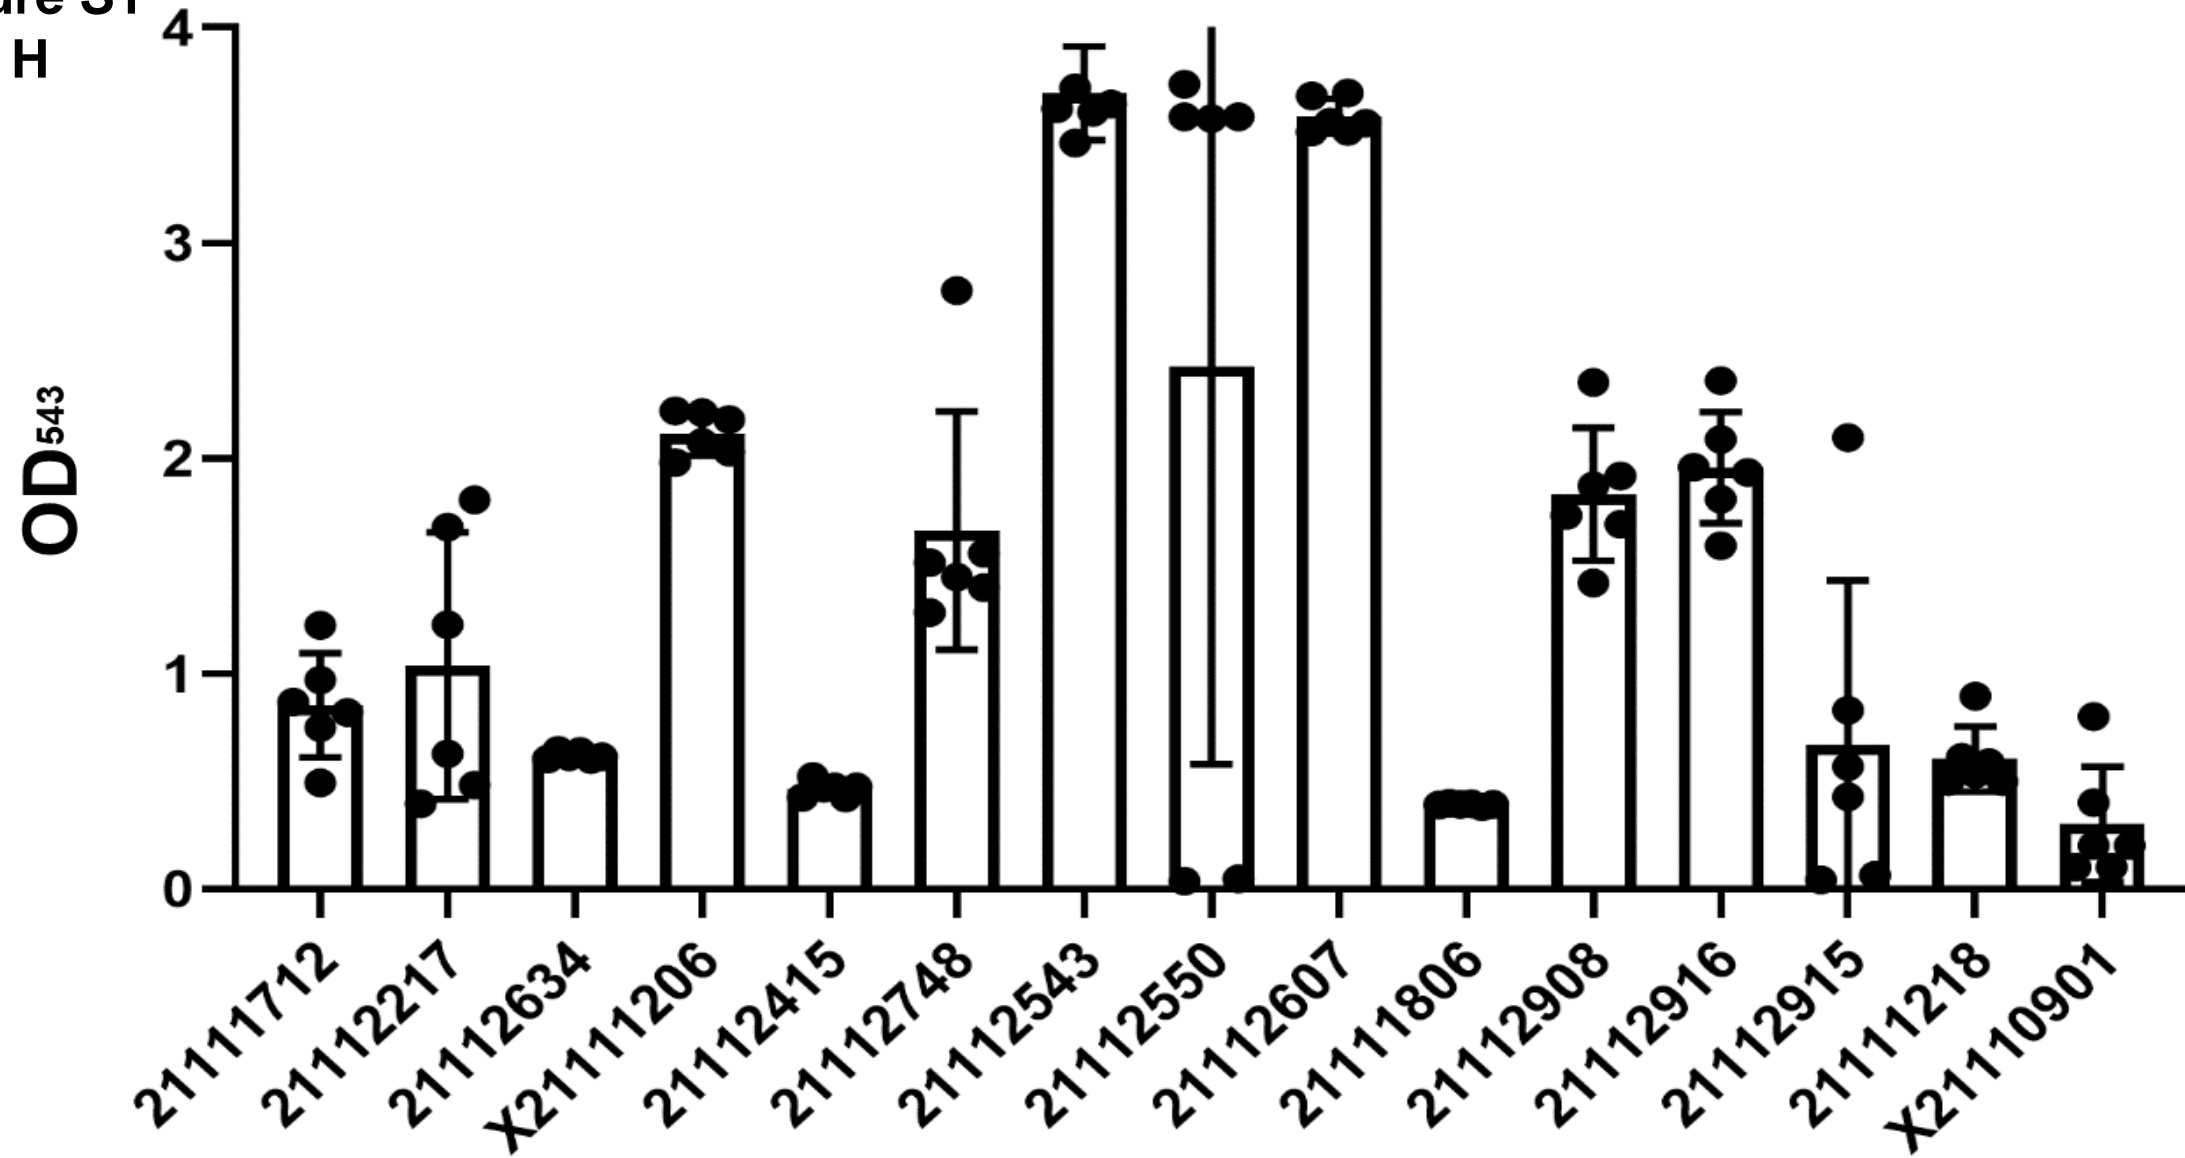



Figure S1

I

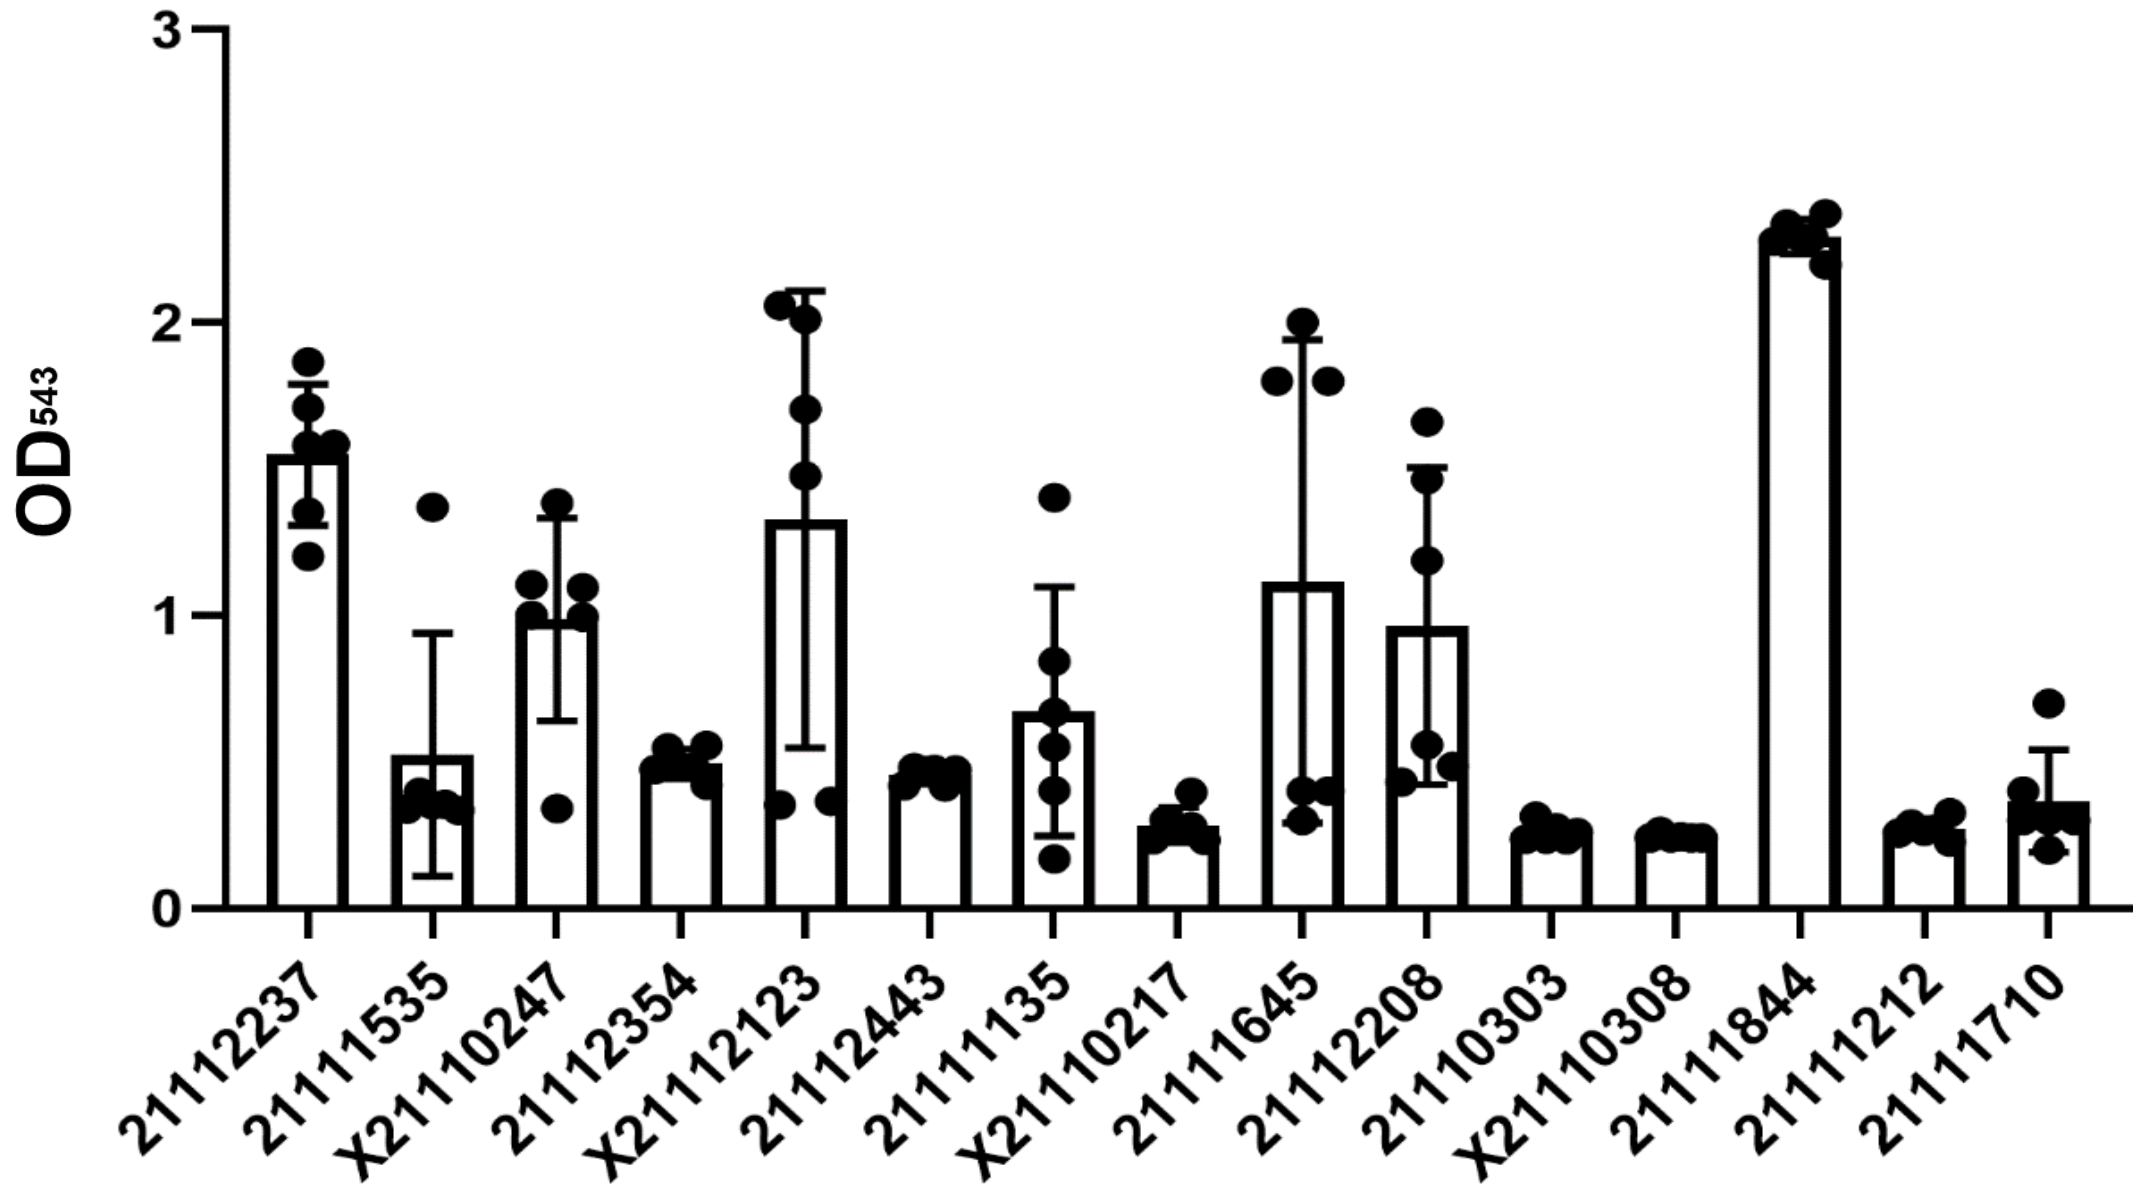

Figure S1

J

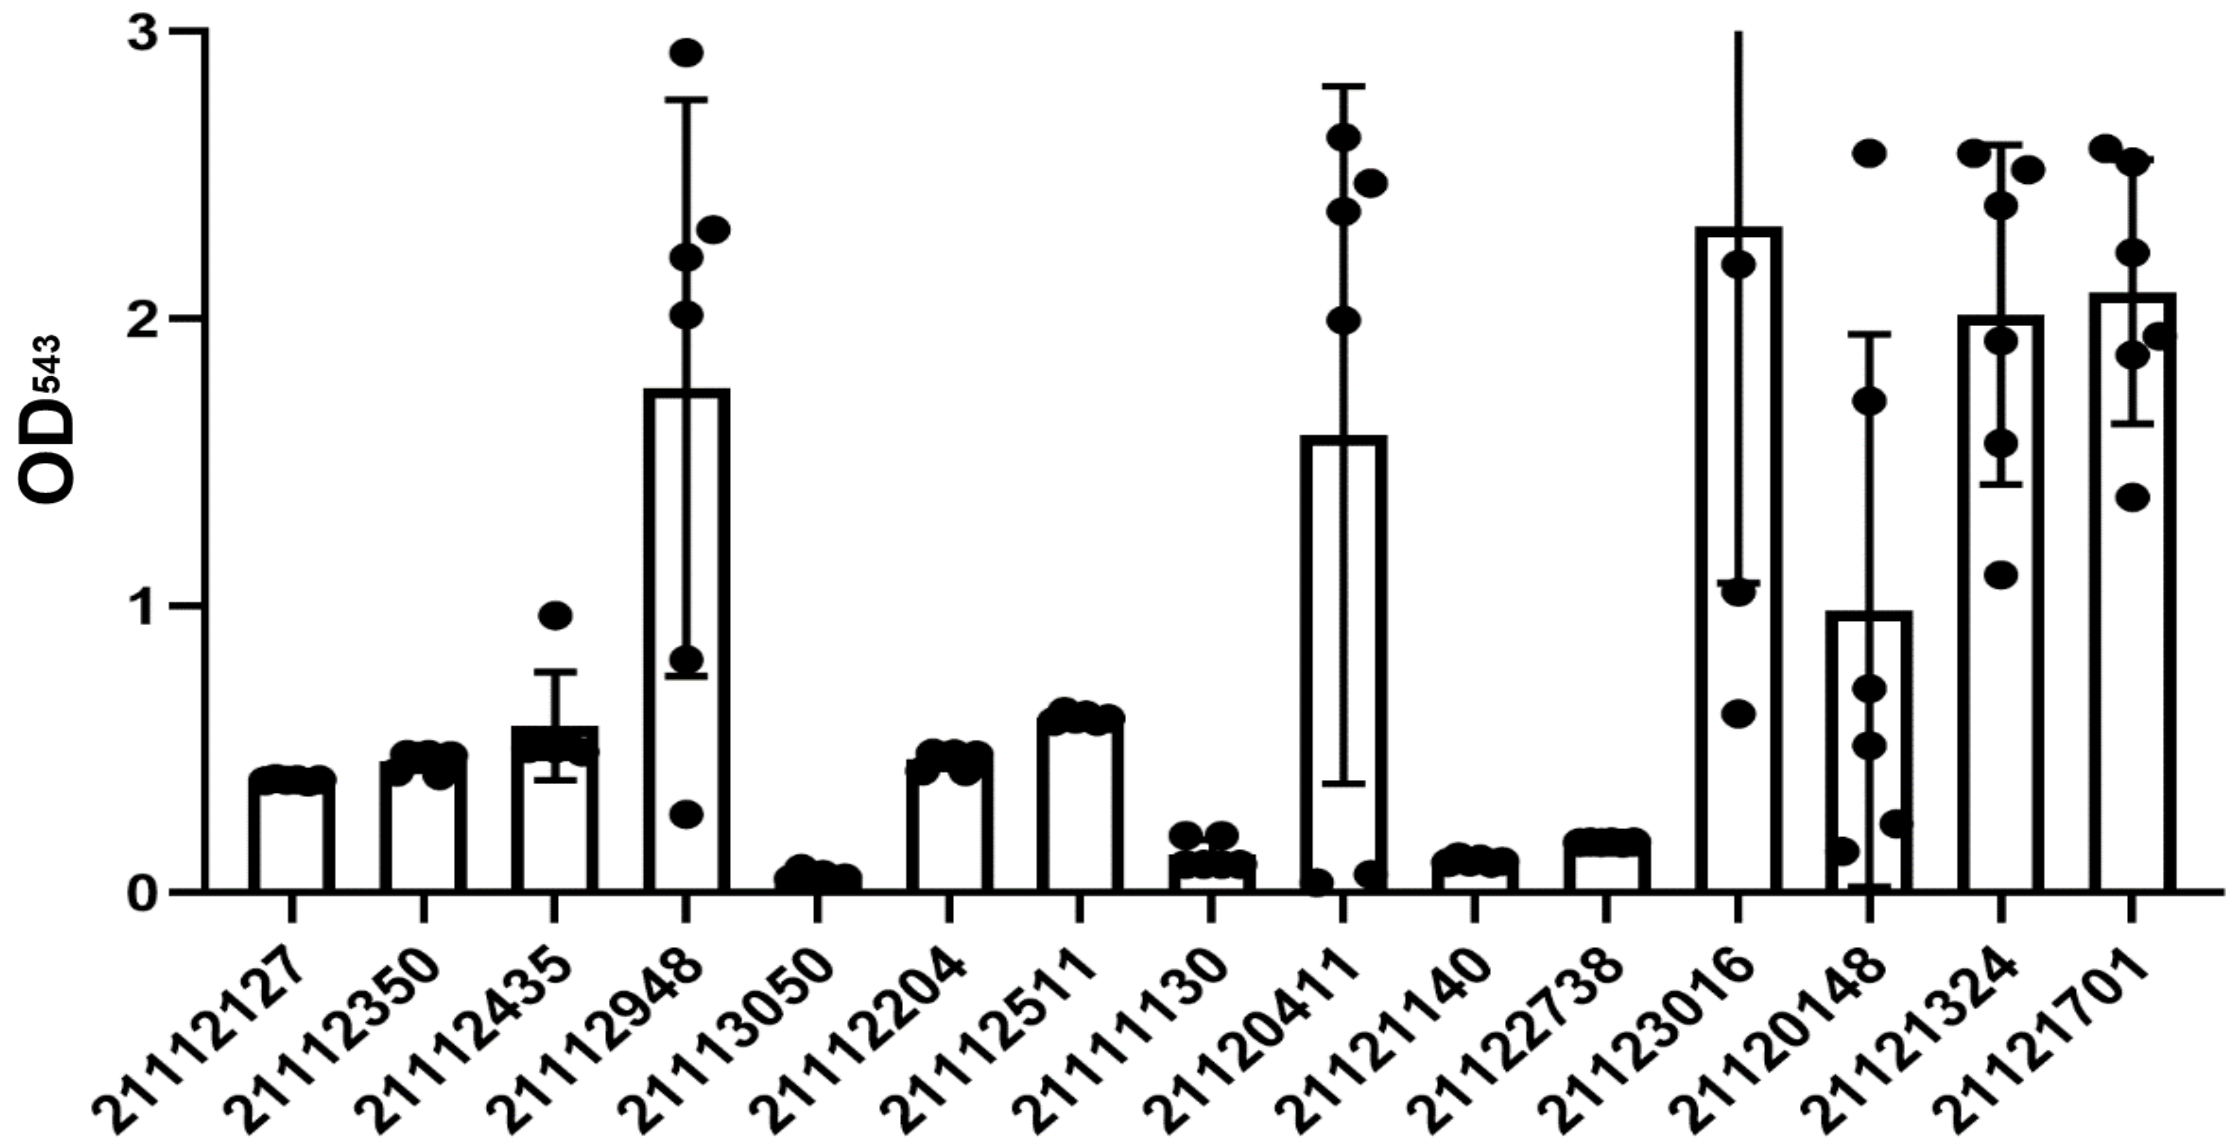

Figure S1

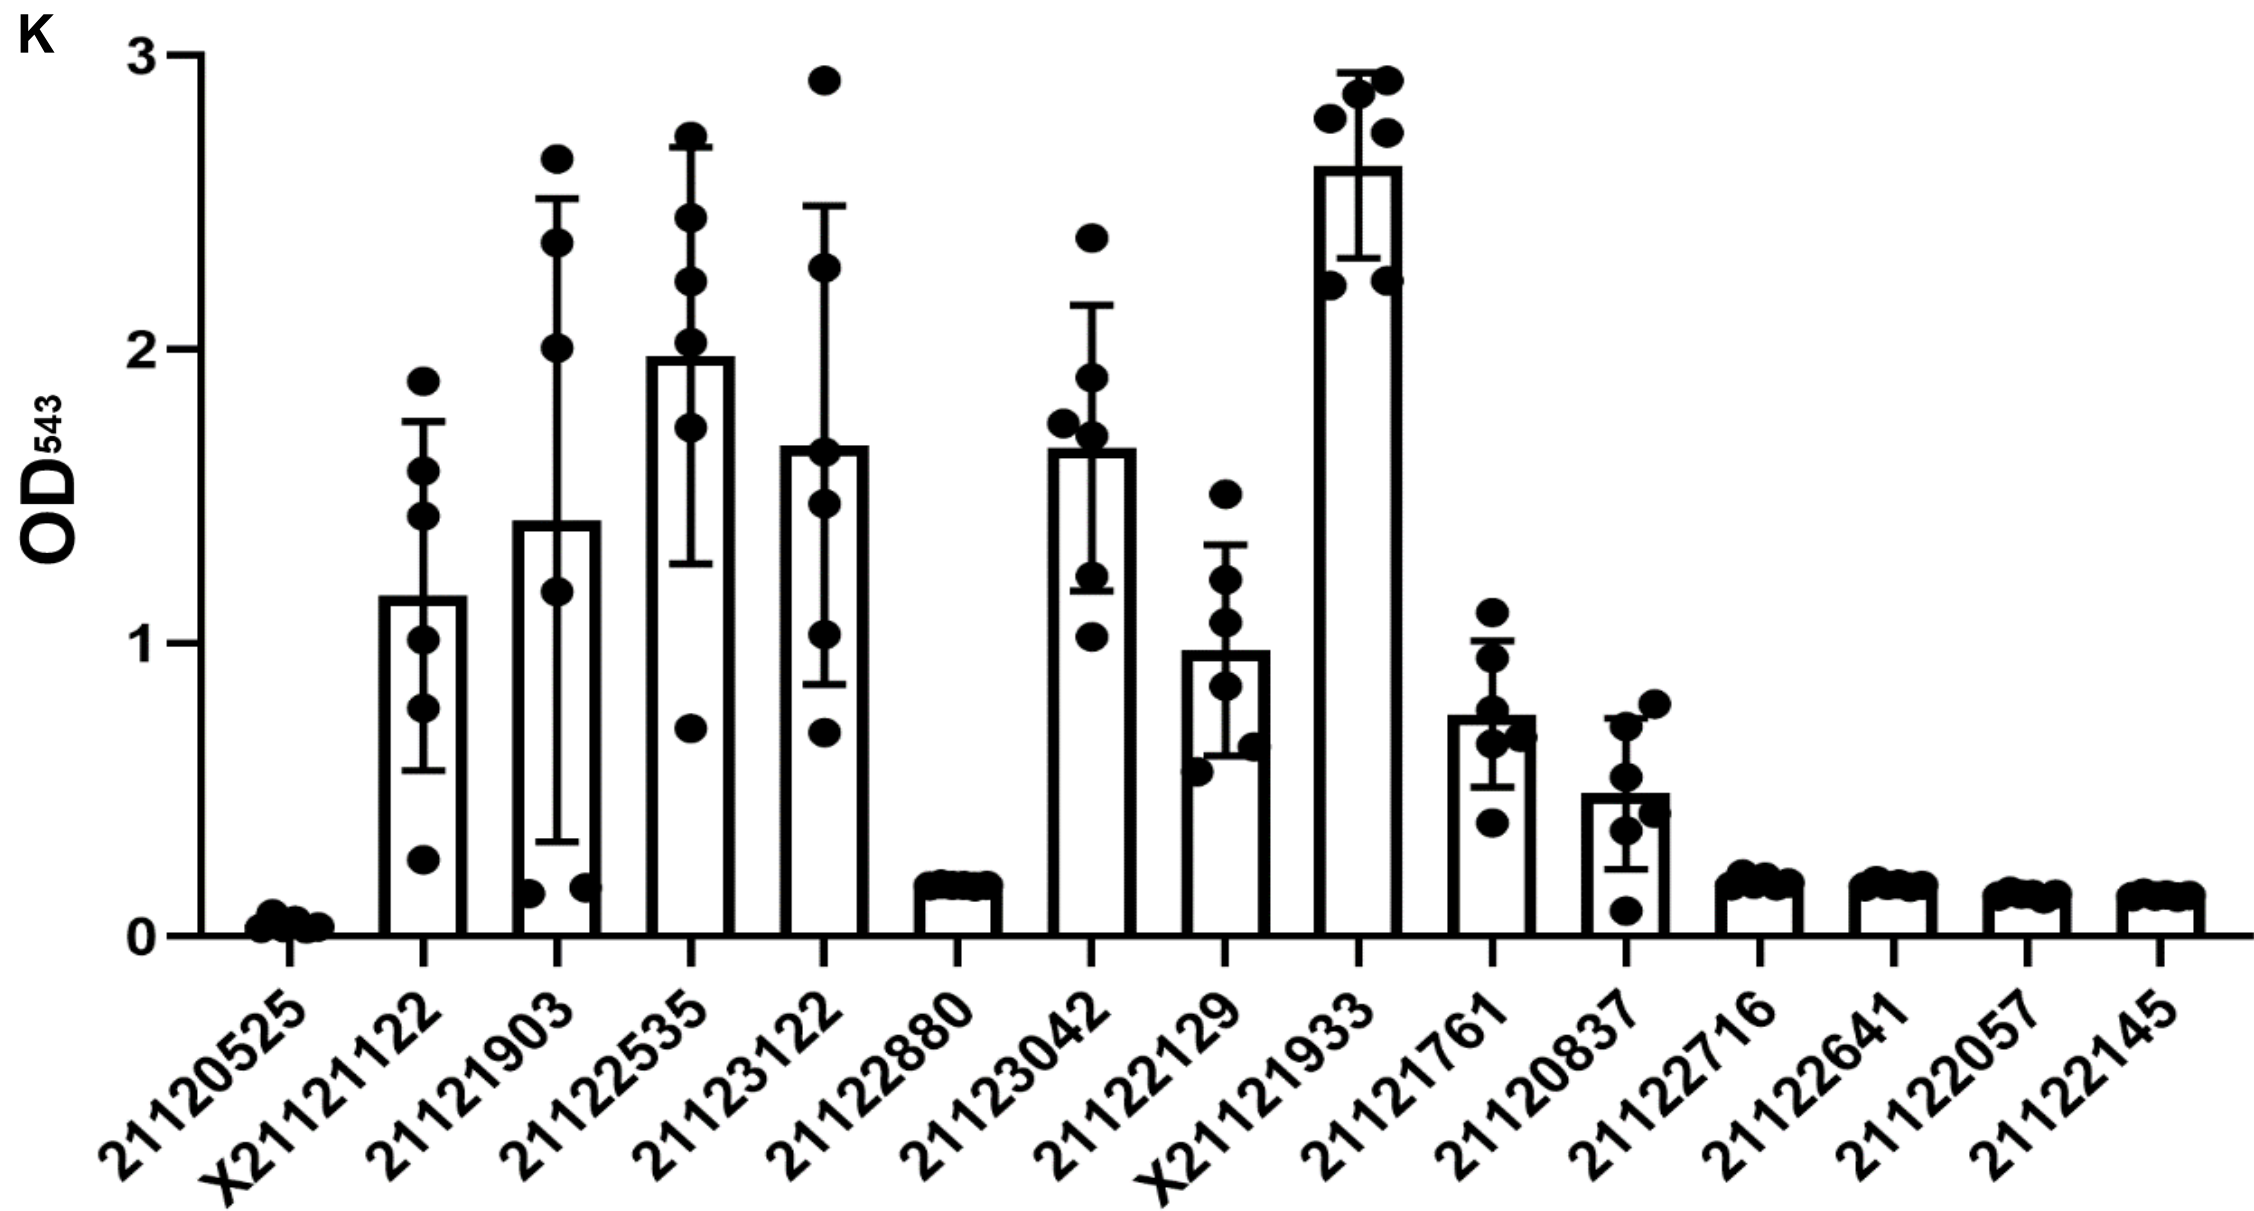

Figure S1

L

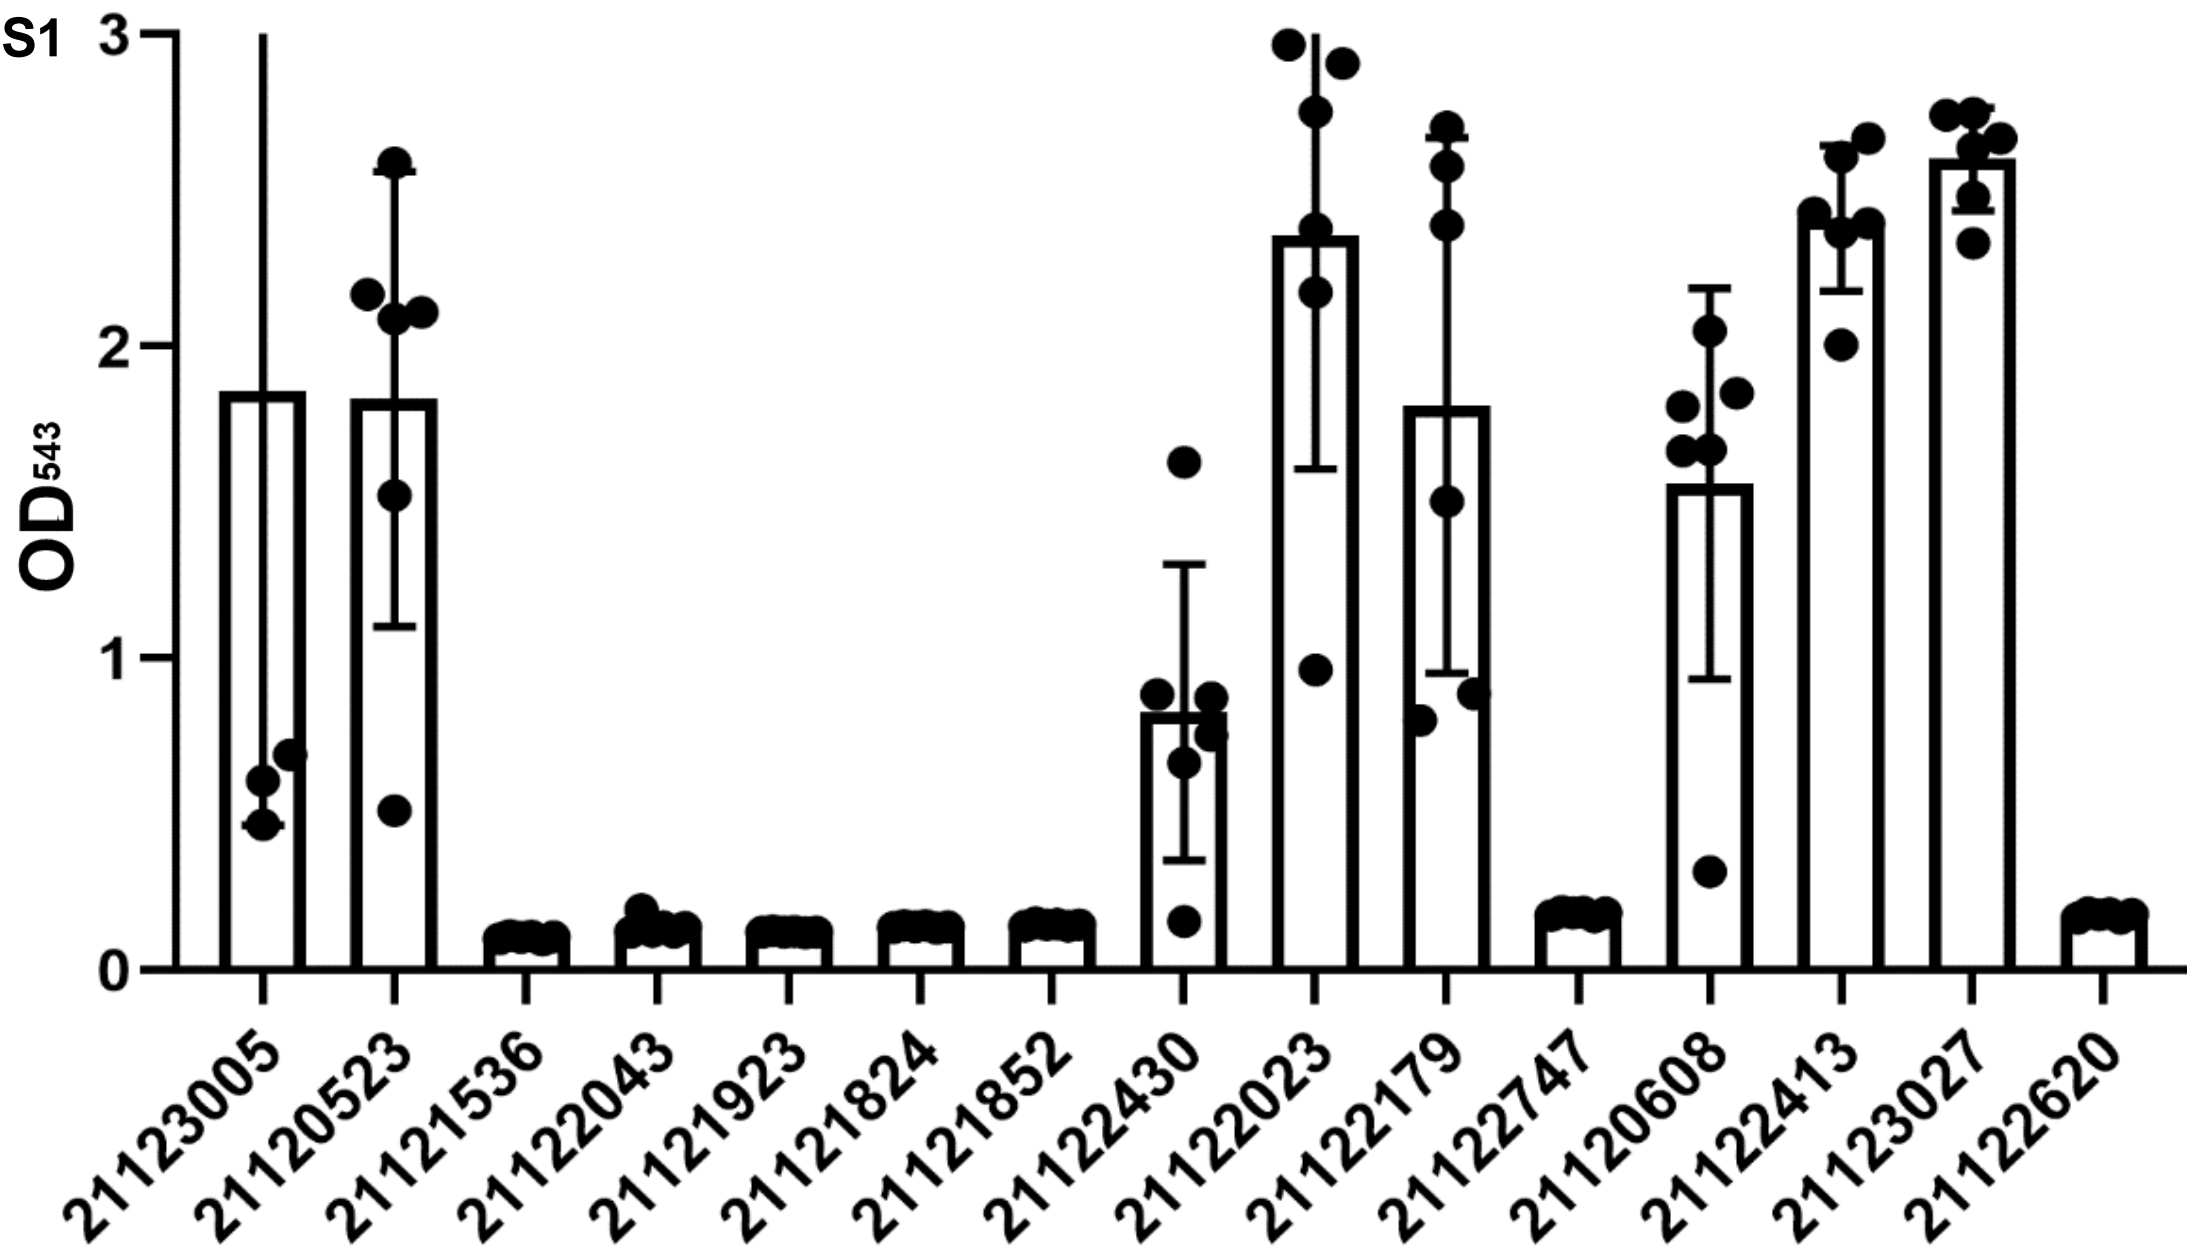

Figure S1

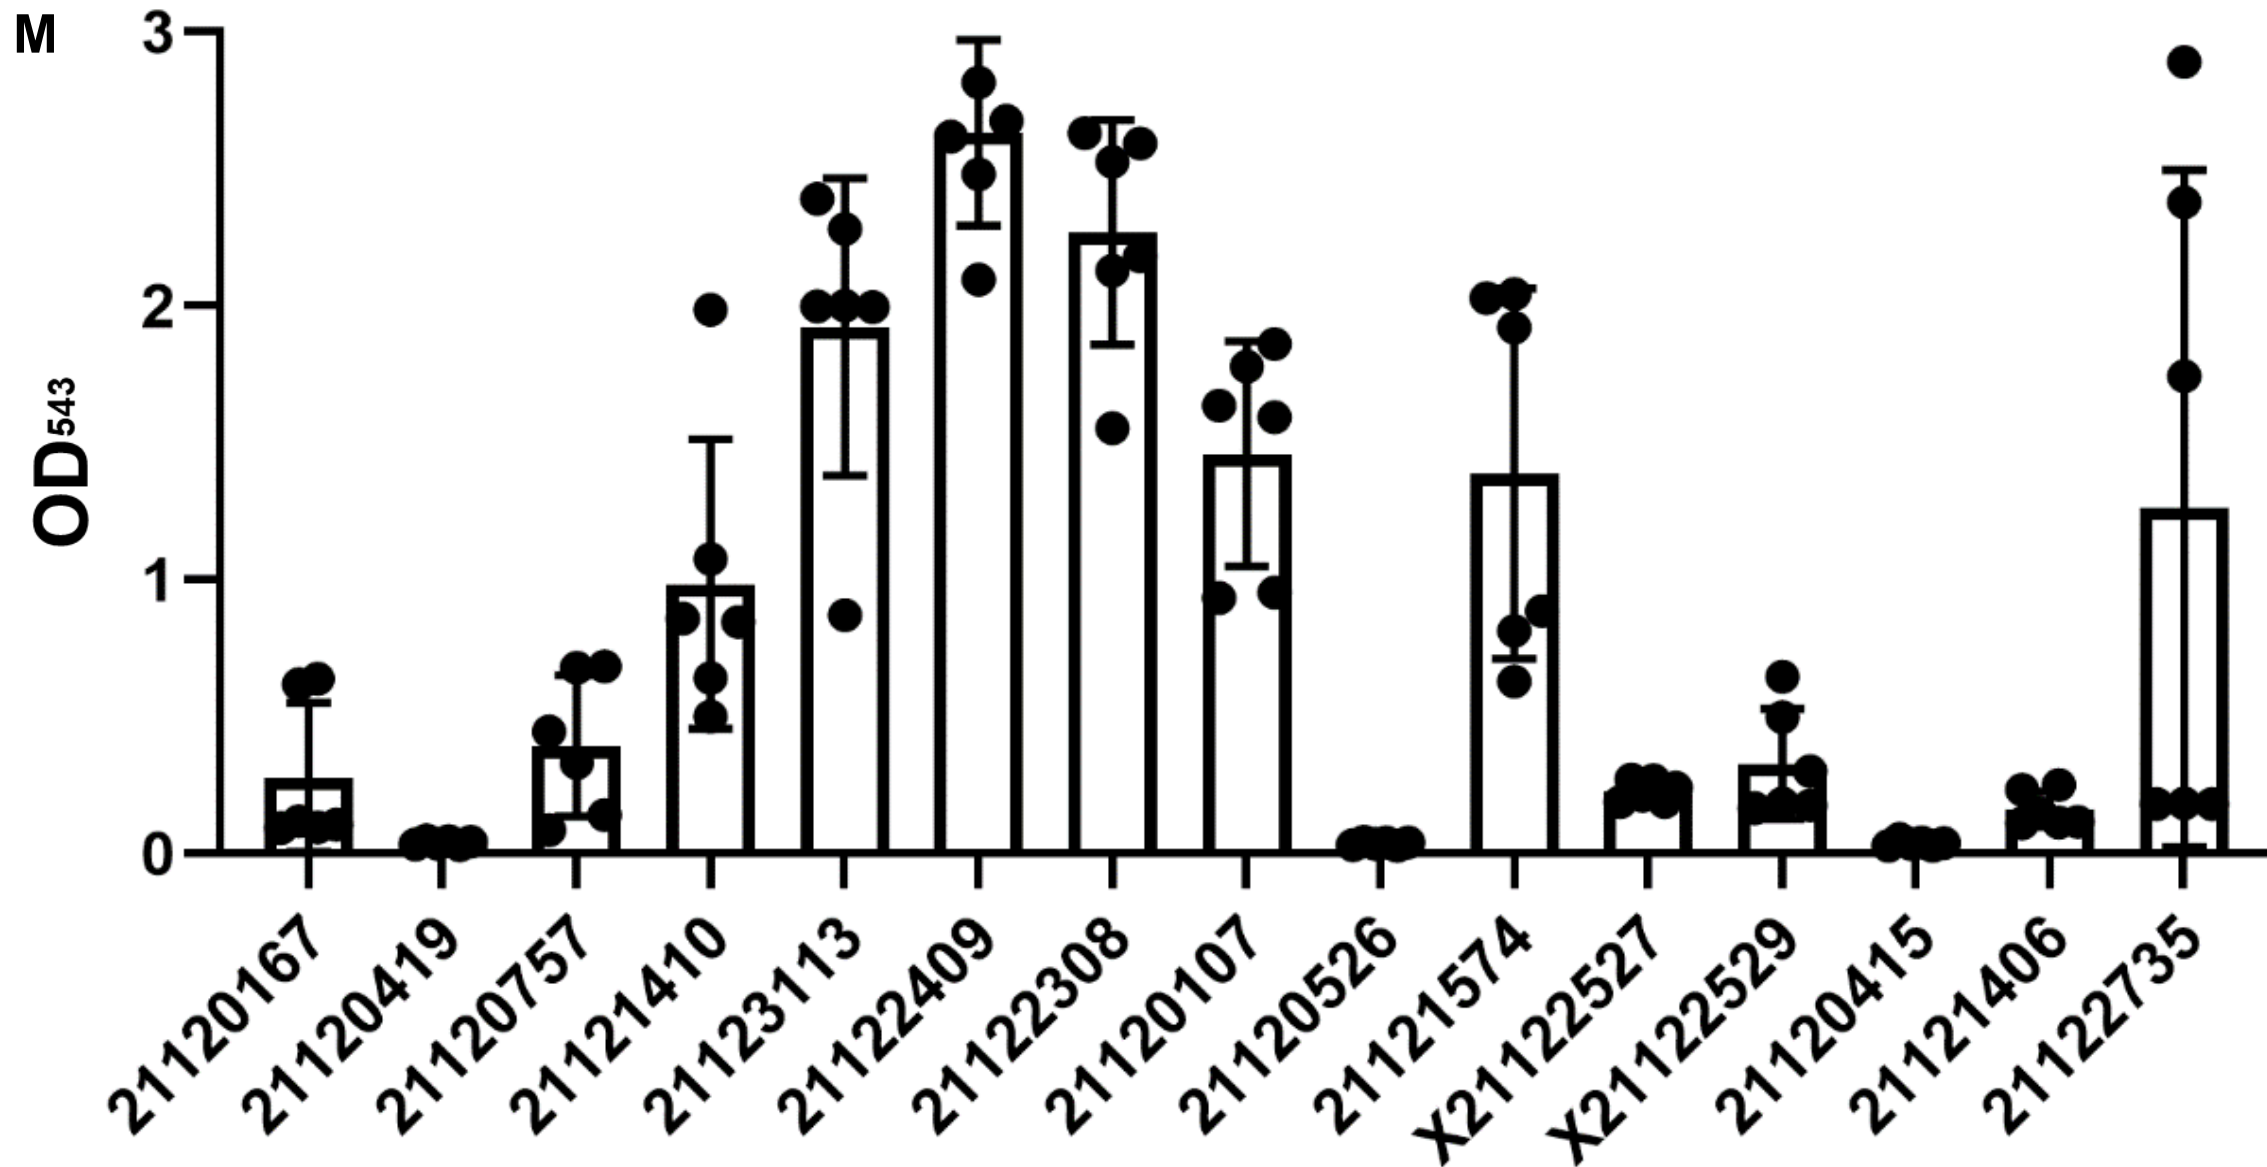

Figure S1

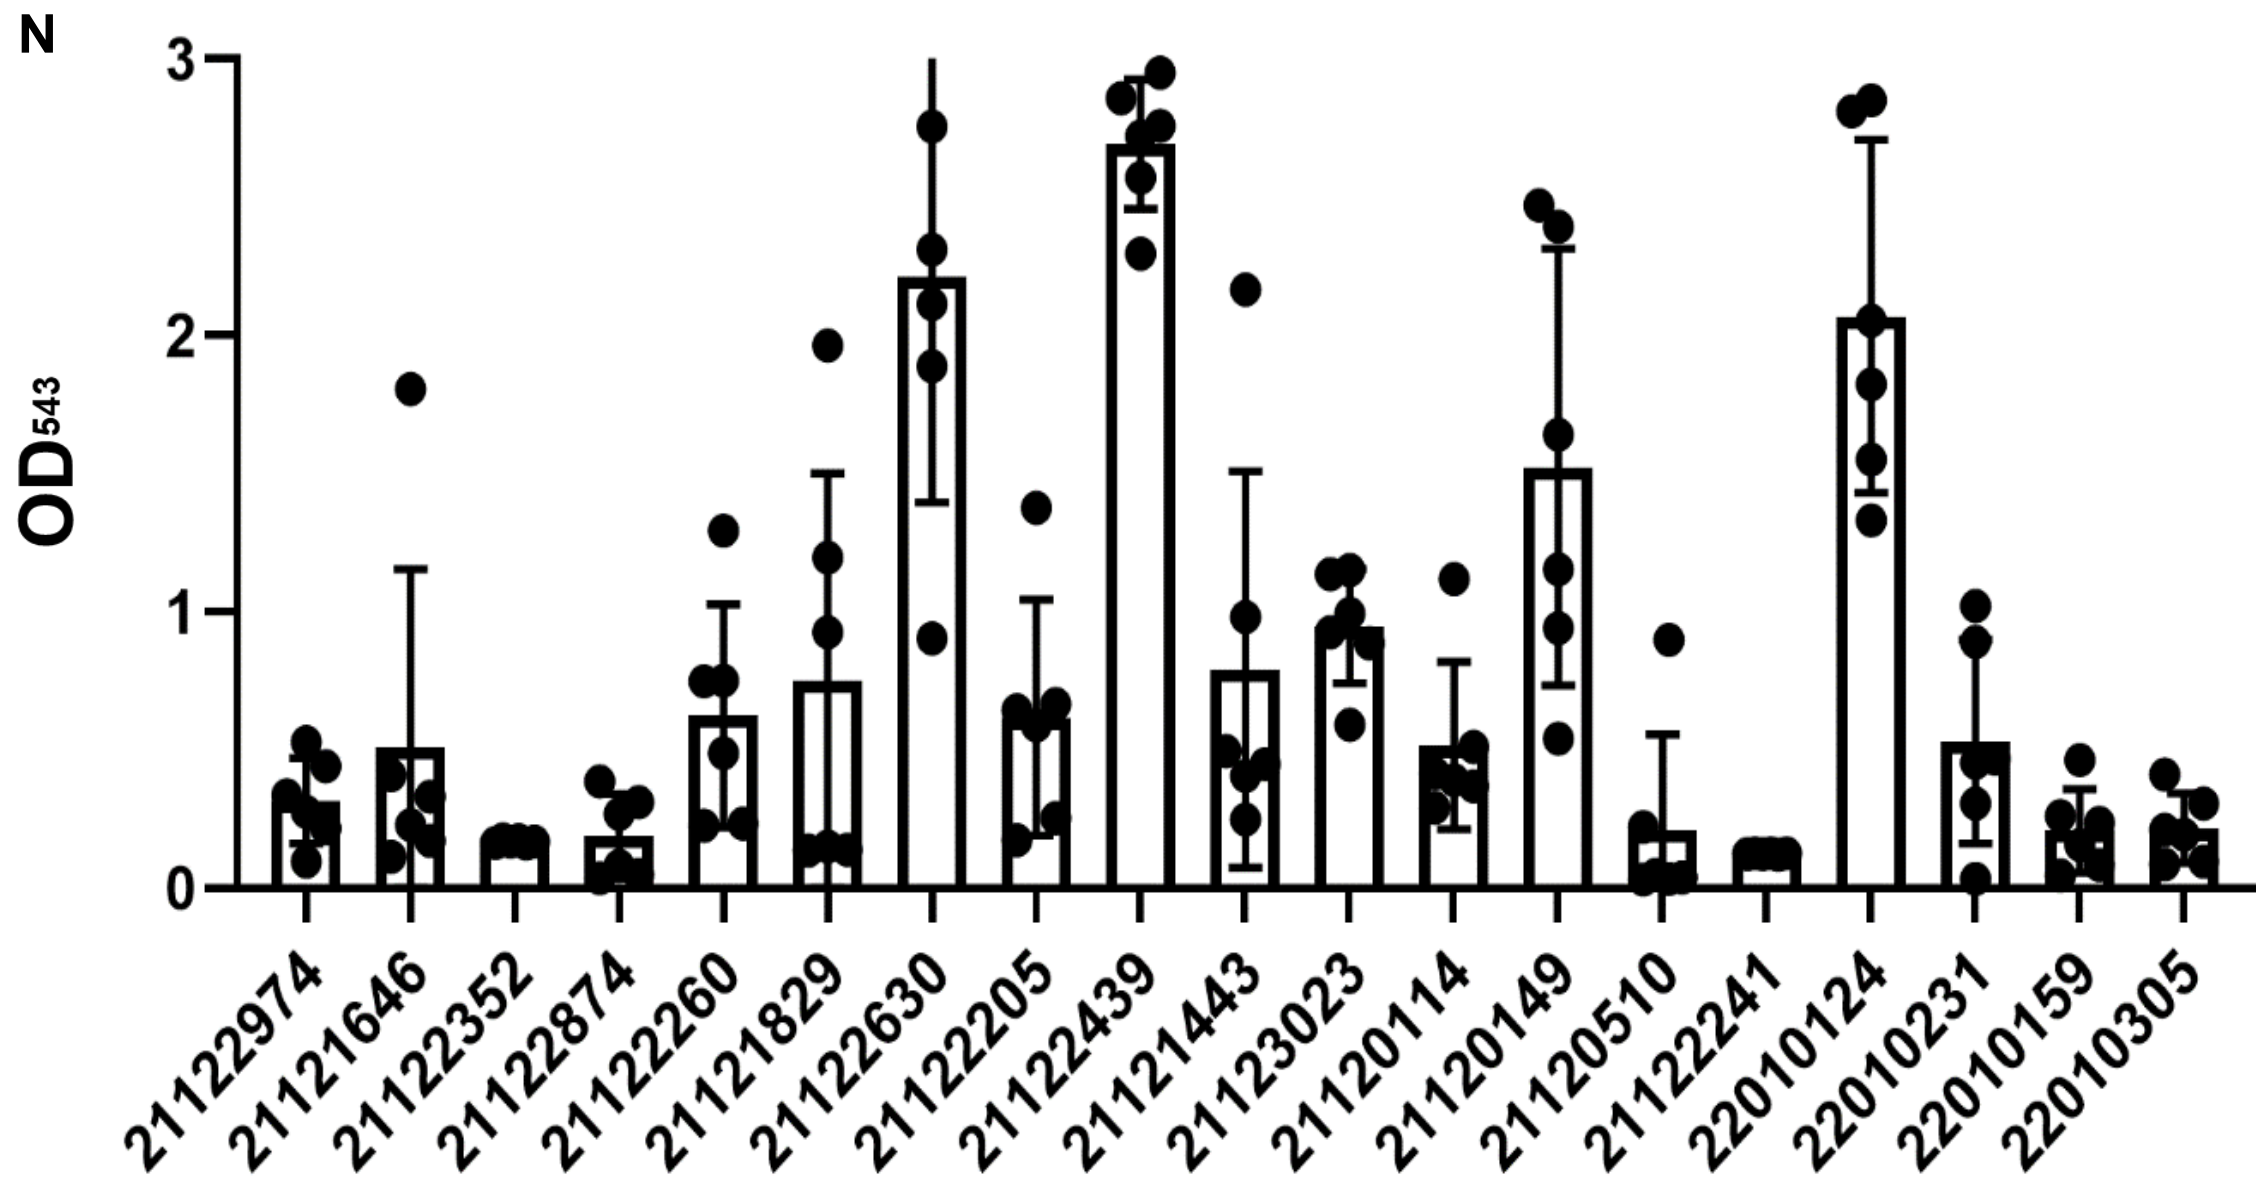

**Supplementary Table 1** Basic clinical information of 82 MDR *Klebsiella pneumoniae* isolates

| <b>Isolate</b> | <b>Age</b> | <b>Underlying<br/>disease</b> | <b>Source</b> | <b>Data<br/>collected</b> | <b>Ward</b>                         | <b>MLST</b> |
|----------------|------------|-------------------------------|---------------|---------------------------|-------------------------------------|-------------|
| KP2000557      | 88/<br>M   | Intracerebral<br>hemorrhage   | Blood         | 2020/01/12                | Neurosurgery<br>ward                | ST751       |
| FRPDR          | 61/<br>M   | Intracerebral<br>hemorrhage   | Sputum        | 2020/5/06                 | Neurosurgery<br>ward                | ST11        |
| 21072123       | 46/<br>M   | Acute leukemia                | Blood         | 2021/07/21                | Hematology<br>ward                  | ST307       |
| 21072129       | 60/<br>M   | Acute leukemia                | Blood         | 2021/07/21                | Hematology<br>ward                  | ST348       |
| 21072133       | 60/<br>M   | Acute leukemia                | Blood         | 2021/07/21                | Hematology<br>ward                  | ST348       |
| 21072205       | 66/<br>M   | Intracerebral<br>hemorrhage   | Blood         | 2021/07/21                | Intensive<br>medicine<br>ward       | ST307       |
| 21072329       | 92/<br>M   | Vascular<br>dementia          | Sputum        | 2021/07/23                | General ward                        | ST11        |
| 21072426       | 1/F        | Pneumonia                     | Sputum        | 2021/07/24                | Pediatric<br>intensive care<br>unit | ST37        |
| 21072515       | 39/        | Pneumoconiosis                | Sputum        | 2021/07/25                | Intensive                           | ST524       |

|          |     |                 |               |            |                |        |
|----------|-----|-----------------|---------------|------------|----------------|--------|
|          | M   |                 |               |            | medicine       |        |
|          |     |                 |               |            | ward           |        |
| 21072527 | 92/ | Vascular        | Sputum        | 2021/07/25 | General ward   | ST1883 |
|          | M   | dementia        |               |            |                |        |
| 21072648 | 70/ | Biliary tract   | Bile          | 2021/07/26 | Interventional | ST3409 |
|          | M   | infection       |               |            | radiation      |        |
|          |     |                 |               |            | ward           |        |
| 21072728 | 80/ | Subarachnoid    | Sputum        | 2021/07/27 | Intensive      | ST107  |
|          | M   | hemorrhage      |               |            | medicine       |        |
|          |     |                 |               |            | ward           |        |
| 21072928 | 92/ | Vascular        | Urine         | 2021/07/29 | General ward   | ST11   |
|          | M   | dementia        |               |            |                |        |
| 21073066 | 27/ | Multiple Trauma | Pleural       | 2021/07/30 | ICU            | ST15   |
|          | M   |                 | effusion      |            |                |        |
| 21073160 | 19/ | Thrombocytopen  | Cerebrospinal | 2021/07/31 | Intensive      | ST11   |
|          | M   | ia              | fluid         |            | medicine       |        |
|          |     |                 |               |            | ward           |        |
| 21073164 | 62/ | Skin infection  | Pus           | 2021/07/31 | Dermatology    | ST307  |
|          | M   |                 |               |            | Ward           |        |
| 21080237 | 27/ | Infection       | Pleural       | 2021/08/02 | Emergency      | ST11   |
|          | M   |                 | effusion      |            | ward           |        |
| 21080534 | 32/ | Pain            | Pleural       | 2021/08/04 | Traumatology   | ST11   |



|          |      |                 |           |            |              |        |  |
|----------|------|-----------------|-----------|------------|--------------|--------|--|
|          | M    |                 | effusion  |            |              | ward   |  |
| 21080631 | 27/  | Infection       | Sputum    | 2021/08/06 | Emergency    | ST11   |  |
|          | M    |                 | 27/M      |            |              | ward   |  |
|          |      |                 | Infection |            |              |        |  |
| 21080937 | 93/  | Jaundice        | Sputum    | 2021/08/09 | Intensive    | ST11   |  |
|          | M    |                 |           |            | medicine     |        |  |
|          |      |                 |           |            | ward         |        |  |
| 21080950 | 54/  | Multiple Trauma | Pleural   | 2021/08/09 | Intensive    | ST15   |  |
|          | M    |                 | effusion  |            | medicine     |        |  |
|          |      |                 |           |            | ward         |        |  |
| 21080960 | 54/  | Multiple Trauma | Pleural   | 2021/08/09 | Intensive    | ST15   |  |
|          | M    |                 | effusion  |            | medicine     |        |  |
|          |      |                 |           |            | ward         |        |  |
| 21081153 | 32/F | Acute leukemia  | Other     | 2021/08/11 | Hematology   | ST678  |  |
|          |      |                 | specime   |            | ward         |        |  |
|          |      |                 | ns        |            |              |        |  |
| 21081212 | 92/F | Cerebrovascular | Urine     | 2021/08/12 | General ward | ST15   |  |
|          |      | insufficiency   |           |            |              |        |  |
| 21081224 | 32/F | Stomach cancer  | Pleural   | 2021/08/12 | Intensive    | ST1271 |  |
|          |      |                 | effusion  |            | medicine     |        |  |
|          |      |                 |           |            | ward         |        |  |
| 21081241 | 70/  | Pneumonia       | Sputum    | 2021/08/12 | Intensive    | ST15   |  |

|          |          |                                                |        |            |                                    |                  |  |
|----------|----------|------------------------------------------------|--------|------------|------------------------------------|------------------|--|
|          | M        |                                                |        |            |                                    | medicine<br>ward |  |
| 21083181 | 58/F     | Intracerebral<br>hemorrhage                    | Urine  | 2021/08/31 | General ward                       | ST11             |  |
| 21090105 | 41/<br>M | Coronary heart<br>disease                      | Sputum | 2021/08/31 | Cardiovascul<br>ar surgery<br>ward | ST307            |  |
| 21090324 | 53/<br>M | Multiple Trauma                                | Sputum | 2021/09/03 | Neurosurgery<br>ward               | ST1644           |  |
| 21090736 | 47/<br>M | Myocardial<br>infarction                       | Sputum | 2021/09/07 | Intensive<br>medicine<br>ward      | ST219            |  |
| 21090924 | 16/<br>M | Central nervous<br>system infection            | Sputum | 2021/09/09 | Intensive<br>medicine<br>ward      | ST709            |  |
| 21091025 | 79/<br>M | Chronic<br>obstructive<br>pulmonary<br>disease | Sputum | 2021/09/10 | Intensive<br>medicine<br>ward      | ST11             |  |
| 21091072 | 66/<br>M | Respiratory<br>failure                         | Sputum | 2021/09/10 | Intensive<br>medicine<br>ward      | ST2571           |  |

|          |          |                                                     |                     |            |                               |       |
|----------|----------|-----------------------------------------------------|---------------------|------------|-------------------------------|-------|
| 21091216 | 53/<br>M | Multiple Trauma                                     | Sputum              | 2021/09/12 | Neurosurgery<br>ward          | ST15  |
| 21091253 | 79/<br>M | Mesenteric artery<br>thrombosis                     | Sputum              | 2021/09/13 | Intensive<br>medicine<br>ward | ST15  |
| 21092036 | 72/<br>M | Pancreatic tumor                                    | Pleural<br>effusion | 2021/09/20 | General<br>surgery ward       | ST211 |
| 21100711 | 90/<br>M | Pneumonia                                           | Sputum              | 2021/10/07 | Emergency<br>medicine<br>ward | ST11  |
| 21101834 | 16/<br>M | Central nervous<br>system infection                 | Sputum              | 2021/10/18 | Intensive<br>medicine<br>ward | ST11  |
| 21102030 | 68/F     | Pneumonia                                           | Sputum              | 2021/10/19 | Intensive<br>medicine<br>ward | ST412 |
| 21102214 | 34/<br>M | Stomach ache                                        | Sputum              | 2021/10/22 | Intensive<br>medicine<br>ward | NA    |
| 21102853 | 64/<br>M | Dysfunction after<br>artificial knee<br>replacement | Pleural<br>effusion | 2021/10/28 | Orthopedic<br>ward            | ST37  |

|          |          |                  |                     |            |                                                      |        |
|----------|----------|------------------|---------------------|------------|------------------------------------------------------|--------|
| 21103127 | 80/<br>M | Pneumonia        | Blood               | 2021/10/31 | ICU                                                  | ST15   |
| 21111074 | 77/<br>M | Bile duct stones | Pleural<br>effusion | 2021/11/10 | General<br>surgery ward                              | ST180  |
| 21111515 | 35/F     | Fever            | Urine               | 2021/11/15 | Emergency<br>ward                                    | ST3034 |
| 21111550 | 53/<br>M | Cholangitis      | Pleural<br>effusion | 2021/11/15 | General<br>surgery ward                              | ST65   |
| 21111620 | 35/F     | Fever            | Blood               | 2021/11/16 | Emergency<br>ward                                    | ST3034 |
| 21111646 | 96/<br>M | Pneumonia        | Sputum              | 2021/11/16 | Intensive<br>medicine<br>ward                        | ST307  |
| 21111661 | 76/<br>M | Pneumonia        | Sputum              | 2021/11/16 | Respiratory<br>and critical<br>care medicine<br>ward | ST11   |
| 21111747 | 42/<br>M | Pneumoconiosis   | Sputum              | 2021/11/17 | Intensive<br>medicine<br>ward                        | ST15   |
| 21112231 | 53/<br>M | Cholangitis      | Bile                | 2021/11/22 | General<br>surgery ward                              | ST65   |

|          |          |                          |                     |            |                                            |        |
|----------|----------|--------------------------|---------------------|------------|--------------------------------------------|--------|
| 21112315 | 4/F      | Acute<br>appendicitis    | Pus                 | 2021/11/22 | Pediatric<br>surgery ward                  | ST2059 |
| 21112561 | 67/<br>M | Pneumonia                | Other<br>specimen   | 2021/11/25 | Intensive<br>medicine<br>ward<br>Pneumonia | ST15   |
| 21112728 | 96/<br>M | Pneumonia                | Sputum              | 2021/11/27 | Intensive<br>medicine<br>ward              | ST307  |
| 21112827 | 74/<br>M | Pancreatic mass          | Pleural<br>effusion | 2021/11/28 | General<br>surgery ward                    | ST5138 |
| 21112839 | 54/F     | Thrombocytopenia         | Blood               | 2021/11/28 | Hematology<br>ward                         | ST485  |
| 21113030 | 97/<br>M | Dementia                 | Urine               | 2021/11/30 | General ward                               | ST307  |
| 21120159 | 52/<br>M | Cholangitis              | Pleural<br>effusion | 2021/12/01 | General<br>surgery ward                    | ST65   |
| 21120240 | 84/F     | Respiratory<br>infection | Sputum              | 2021/12/02 | General ward                               | ST11   |
| 21120463 | 64/<br>M | Aortic dissection        | Sputum              | 2021/12/03 | Cardiovascul<br>ar surgery<br>ward         | ST193  |

|           |          |                                       |        |            |                                |        |
|-----------|----------|---------------------------------------|--------|------------|--------------------------------|--------|
| 21120606  | 64/<br>M | Aortic dissection                     | Sputum | 2021/12/06 | Cardiovascular surgery<br>ward | ST193  |
| 21120826  | 96/<br>M | Chronic obstructive pulmonary disease | Sputum | 2021/12/08 | Intensive medicine ward        | ST307  |
| 21120944  | 78/F     | Esophageal malignancy                 | Urine  | 2021/12/09 | Radiation oncology Ward        | ST5799 |
| 21121302  | 96/<br>M | Chronic obstructive pulmonary disease | Urine  | 2021/12/13 | Intensive medicine ward        | ST307  |
| 21121624  | 73/<br>M | Disorders of consciousness            | Sputum | 2021/12/15 | Intensive medicine ward        | ST15   |
| 21121928  | 80/F     | Pneumonia                             | Sputum | 2021/12/19 | Intensive medicine ward        | ST15   |
| 211221031 | 90/F     | Pneumonia                             | Urine  | 2021/12/21 | General ward                   | ST11   |
| 21122105  | 91/      | Alzheimer's                           | Urine  | 2021/12/21 | General ward                   | ST15   |

|          |      |                 |          |            |              |        |  |
|----------|------|-----------------|----------|------------|--------------|--------|--|
|          | M    | disease         |          |            |              |        |  |
| 21122243 | 65/  | Motor neurone   | Sputum   | 2021/12/22 | Intensive    | ST1933 |  |
|          | M    | disease         |          |            | medicine     |        |  |
|          |      |                 |          |            | ward         |        |  |
| 21122245 | 65/  | Motor neurone   | Urine    | 2021/12/22 | Intensive    | ST1933 |  |
|          | M    | disease         |          |            | medicine     |        |  |
|          |      |                 |          |            | ward         |        |  |
| 21122431 | 97/  | Dementia        | Urine    | 2021/12/24 | General ward | ST307  |  |
|          | M    |                 |          |            |              |        |  |
| 21122623 | 58/F | Myelodysplastic | Urine    | 2021/12/26 | Hematology   | ST1958 |  |
|          |      | syndrome        |          |            | ward         |        |  |
| 22010104 | 64/  | Infection       | Pleural  | 2022/01/01 | Orthopedic   | ST1787 |  |
|          | M    |                 | effusion |            | ward         |        |  |
| 22010122 | 90/  | Dementia        | Urine    | 2022/01/01 | General ward | NA     |  |
|          | M    |                 |          |            |              |        |  |
| 22010302 | 58/F | Adult acute     | Urine    | Blood      | Hematology   | ST147  |  |
|          |      | lymphoblastic   |          |            | ward         |        |  |
|          |      | leukemia        |          |            |              |        |  |
| 22010330 | 68/  | Coronary heart  | Sputum   | 2022/01/02 | Cardiovascul | ST519  |  |
|          | M    | disease         |          |            | ar surgery   |        |  |
|          |      |                 |          |            | ward         |        |  |
| 22010519 | 64/  | Infection       | Pleural  | 2022/01/05 | Orthopedic   | ST1787 |  |

---

M

effusion

ward

---

NA: unknown MLST type.
